# Supplementary material for: The metagenome of the female upper reproductive tract
Source: PubMed Central journal article supplement (PMC6177736; doi:10.1093/gigascience/giy107), 2018-09-06

|                                                      |                                                                                                                                                                                                                                                                                                                                                                                                                                                                                                                                                                                                                                                                                                                                                                                                                                                                                                                                                                                                                                                                                                                                                                                                                                                                                                                                                                                                                                                                                                                                                                                                                                                                                                                                                                                                                                                               |
|------------------------------------------------------|---------------------------------------------------------------------------------------------------------------------------------------------------------------------------------------------------------------------------------------------------------------------------------------------------------------------------------------------------------------------------------------------------------------------------------------------------------------------------------------------------------------------------------------------------------------------------------------------------------------------------------------------------------------------------------------------------------------------------------------------------------------------------------------------------------------------------------------------------------------------------------------------------------------------------------------------------------------------------------------------------------------------------------------------------------------------------------------------------------------------------------------------------------------------------------------------------------------------------------------------------------------------------------------------------------------------------------------------------------------------------------------------------------------------------------------------------------------------------------------------------------------------------------------------------------------------------------------------------------------------------------------------------------------------------------------------------------------------------------------------------------------------------------------------------------------------------------------------------------------|
| <b>Manuscript Number:</b>                            | GIGA-D-18-00184                                                                                                                                                                                                                                                                                                                                                                                                                                                                                                                                                                                                                                                                                                                                                                                                                                                                                                                                                                                                                                                                                                                                                                                                                                                                                                                                                                                                                                                                                                                                                                                                                                                                                                                                                                                                                                               |
| <b>Full Title:</b>                                   | The metagenome of the female upper reproductive tract                                                                                                                                                                                                                                                                                                                                                                                                                                                                                                                                                                                                                                                                                                                                                                                                                                                                                                                                                                                                                                                                                                                                                                                                                                                                                                                                                                                                                                                                                                                                                                                                                                                                                                                                                                                                         |
| <b>Article Type:</b>                                 | Research                                                                                                                                                                                                                                                                                                                                                                                                                                                                                                                                                                                                                                                                                                                                                                                                                                                                                                                                                                                                                                                                                                                                                                                                                                                                                                                                                                                                                                                                                                                                                                                                                                                                                                                                                                                                                                                      |
| <b>Funding Information:</b>                          |                                                                                                                                                                                                                                                                                                                                                                                                                                                                                                                                                                                                                                                                                                                                                                                                                                                                                                                                                                                                                                                                                                                                                                                                                                                                                                                                                                                                                                                                                                                                                                                                                                                                                                                                                                                                                                                               |
| <b>Abstract:</b>                                     | <p>Background</p> <p>The human uterus is traditionally believed to be sterile, while the vaginal microbiota plays important roles in fending off pathogens. Emerging evidence demonstrates the presence of bacteria beyond the vagina. However, a microbiome-wide metagenomic analysis identifying the overall microorganism communities has been lacking.</p> <p>Results</p> <p>We performed shotgun-sequencing by Illumina platform of 52 samples from the cervical canal and the peritoneal fluid of Chinese women in reproductive age. Direct annotation of sequencing reads identified the taxonomy of bacteria, archaea, fungi and viruses, confirming and extending the results from our previous study. We replicated the findings in another 24 samples from the vagina, the cervical canal, the uterus and the peritoneal fluid using BGISEQ-500 platform, revealing that microorganisms in the samples from the same individual were largely shared in the whole reproductive tract. Over 99% human sequences were detected in the 20GB raw data. After filtering, vaginal microorganisms were well covered in the generated reproductive tract gene catalogue, while the more diverse upper reproductive tract microbiota might need greater depth of sequencing and more samples to meet the full coverage scale.</p> <p>Conclusions</p> <p>Microbiota in unprecedented data for uncharted body site, female upper reproductive tract, were analyzed in this study. The community results indicated that an intra-individual continuum of all types of microorganisms gradually changed from the vagina to the peritoneal fluid. A framework was also established in this study aiming at understanding the implications of the composition and functional potential of this distinct microbial ecosystem in relation to health and disease.</p> |
| <b>Corresponding Author:</b>                         | Huijue Jia<br><br>CHINA                                                                                                                                                                                                                                                                                                                                                                                                                                                                                                                                                                                                                                                                                                                                                                                                                                                                                                                                                                                                                                                                                                                                                                                                                                                                                                                                                                                                                                                                                                                                                                                                                                                                                                                                                                                                                                       |
| <b>Corresponding Author Secondary Information:</b>   |                                                                                                                                                                                                                                                                                                                                                                                                                                                                                                                                                                                                                                                                                                                                                                                                                                                                                                                                                                                                                                                                                                                                                                                                                                                                                                                                                                                                                                                                                                                                                                                                                                                                                                                                                                                                                                                               |
| <b>Corresponding Author's Institution:</b>           |                                                                                                                                                                                                                                                                                                                                                                                                                                                                                                                                                                                                                                                                                                                                                                                                                                                                                                                                                                                                                                                                                                                                                                                                                                                                                                                                                                                                                                                                                                                                                                                                                                                                                                                                                                                                                                                               |
| <b>Corresponding Author's Secondary Institution:</b> |                                                                                                                                                                                                                                                                                                                                                                                                                                                                                                                                                                                                                                                                                                                                                                                                                                                                                                                                                                                                                                                                                                                                                                                                                                                                                                                                                                                                                                                                                                                                                                                                                                                                                                                                                                                                                                                               |
| <b>First Author:</b>                                 | Chen Chen                                                                                                                                                                                                                                                                                                                                                                                                                                                                                                                                                                                                                                                                                                                                                                                                                                                                                                                                                                                                                                                                                                                                                                                                                                                                                                                                                                                                                                                                                                                                                                                                                                                                                                                                                                                                                                                     |
| <b>First Author Secondary Information:</b>           |                                                                                                                                                                                                                                                                                                                                                                                                                                                                                                                                                                                                                                                                                                                                                                                                                                                                                                                                                                                                                                                                                                                                                                                                                                                                                                                                                                                                                                                                                                                                                                                                                                                                                                                                                                                                                                                               |
| <b>Order of Authors:</b>                             | Chen Chen<br>Fei Li<br>Zirong Wang<br>Weixia Wei<br>Juanjuan Dai<br>Lilan Hao                                                                                                                                                                                                                                                                                                                                                                                                                                                                                                                                                                                                                                                                                                                                                                                                                                                                                                                                                                                                                                                                                                                                                                                                                                                                                                                                                                                                                                                                                                                                                                                                                                                                                                                                                                                 |

|                                                                                                                                                                                                                                                                                                                                                                                                                                                                                               |                     |
|-----------------------------------------------------------------------------------------------------------------------------------------------------------------------------------------------------------------------------------------------------------------------------------------------------------------------------------------------------------------------------------------------------------------------------------------------------------------------------------------------|---------------------|
|                                                                                                                                                                                                                                                                                                                                                                                                                                                                                               | Liju Song           |
|                                                                                                                                                                                                                                                                                                                                                                                                                                                                                               | Xiaowei Zhang       |
|                                                                                                                                                                                                                                                                                                                                                                                                                                                                                               | Liping Zeng         |
|                                                                                                                                                                                                                                                                                                                                                                                                                                                                                               | Hui Du              |
|                                                                                                                                                                                                                                                                                                                                                                                                                                                                                               | Huiru Tang          |
|                                                                                                                                                                                                                                                                                                                                                                                                                                                                                               | Na Liu              |
|                                                                                                                                                                                                                                                                                                                                                                                                                                                                                               | Huanming Yang       |
|                                                                                                                                                                                                                                                                                                                                                                                                                                                                                               | Jian Wang           |
|                                                                                                                                                                                                                                                                                                                                                                                                                                                                                               | Lise Madsen         |
|                                                                                                                                                                                                                                                                                                                                                                                                                                                                                               | Susanne Brix        |
|                                                                                                                                                                                                                                                                                                                                                                                                                                                                                               | Karsten Kristiansen |
|                                                                                                                                                                                                                                                                                                                                                                                                                                                                                               | Xun Xu              |
|                                                                                                                                                                                                                                                                                                                                                                                                                                                                                               | Junhua Li           |
|                                                                                                                                                                                                                                                                                                                                                                                                                                                                                               | Ruifang Wu          |
|                                                                                                                                                                                                                                                                                                                                                                                                                                                                                               | Huijue Jia          |
| <b>Order of Authors Secondary Information:</b>                                                                                                                                                                                                                                                                                                                                                                                                                                                |                     |
| <b>Additional Information:</b>                                                                                                                                                                                                                                                                                                                                                                                                                                                                |                     |
| <b>Question</b>                                                                                                                                                                                                                                                                                                                                                                                                                                                                               | <b>Response</b>     |
| Are you submitting this manuscript to a special series or article collection?                                                                                                                                                                                                                                                                                                                                                                                                                 | No                  |
| <b>Experimental design and statistics</b><br><br>Full details of the experimental design and statistical methods used should be given in the Methods section, as detailed in our <a href="#">Minimum Standards Reporting Checklist</a> . Information essential to interpreting the data presented should be made available in the figure legends.<br><br>Have you included all the information requested in your manuscript?                                                                  | Yes                 |
| <b>Resources</b><br><br>A description of all resources used, including antibodies, cell lines, animals and software tools, with enough information to allow them to be uniquely identified, should be included in the Methods section. Authors are strongly encouraged to cite <a href="#">Research Resource Identifiers</a> (RRIDs) for antibodies, model organisms and tools, where possible.<br><br>Have you included the information requested as detailed in our <a href="#">Minimum</a> | Yes                 |

|                                                                                                                                                                                                                                                                                                                                                                                                                                                                                                                                                         |            |
|---------------------------------------------------------------------------------------------------------------------------------------------------------------------------------------------------------------------------------------------------------------------------------------------------------------------------------------------------------------------------------------------------------------------------------------------------------------------------------------------------------------------------------------------------------|------------|
| <a href="#">Standards Reporting Checklist?</a>                                                                                                                                                                                                                                                                                                                                                                                                                                                                                                          |            |
| <p><b>Availability of data and materials</b></p> <p>All datasets and code on which the conclusions of the paper rely must be either included in your submission or deposited in <a href="#">publicly available repositories</a> (where available and ethically appropriate), referencing such data using a unique identifier in the references and in the “Availability of Data and Materials” section of your manuscript.</p> <p>Have you have met the above requirement as detailed in our <a href="#">Minimum Standards Reporting Checklist?</a></p> | <p>Yes</p> |

# The metagenome of the female upper reproductive tract

Chen Chen<sup>2,3,\*</sup>, Fei Li<sup>1,2,3\*</sup>, Zirong Wang<sup>2,\*</sup>, Weixia Wei<sup>4,5,\*</sup>, Juanjuan Dai<sup>4,5</sup>, Lilan Hao<sup>2,3</sup>, Liju Song<sup>2,3</sup>, Xiaowei Zhang<sup>2,3</sup>, Liping Zeng<sup>4,5</sup>, Hui Du<sup>4,5</sup>, Huiru Tang<sup>4,5</sup>, Na Liu<sup>6</sup>, Huanming Yang<sup>2,9</sup>, Jian Wang<sup>2,9</sup>, Lise Madsen<sup>2,7,11</sup>, Susanne Brix<sup>12</sup>, Karsten Kristiansen<sup>2,7</sup>, Xun Xu<sup>2,3</sup>, Junhua Li<sup>2,3,8,13</sup>, Ruifang Wu<sup>4,5†</sup>, Huijue Jia<sup>2,3,8,10,†</sup>

<sup>1</sup>BGI Education Center, University of Chinese Academy of Sciences, Shenzhen 518083, China.

<sup>2</sup>BGI-Shenzhen, Shenzhen 518083, China.

<sup>3</sup>China National GeneBank, BGI-Shenzhen, Shenzhen 518120, China.

<sup>4</sup>Peking University Shenzhen Hospital, Shenzhen 518036, China.

<sup>5</sup>Shenzhen Key Laboratory on Technology for Early Diagnosis of Major Gynecological diseases, Shenzhen, PR China

<sup>6</sup>BGI genomics, BGI-Shenzhen, Shenzhen 518083, China

<sup>7</sup>Laboratory of Genomics and Molecular Biomedicine, Department of Biology, University of Copenhagen, Universitetsparken 13, 2100 Copenhagen, Denmark.

<sup>8</sup>Shenzhen Key Laboratory of Human Commensal Microorganisms and Health Research, BGI-Shenzhen, Shenzhen 518083, China.

<sup>9</sup>James D. Watson Institute of Genome Sciences, Hangzhou310000, China.

<sup>10</sup>Macau University of Science and Technology, Taipa, Macau 999078, China.

<sup>11</sup>Institute of Marine Research (IMR), Postboks 1870, Nordnes, N-5817, Bergen, Norway.

<sup>12</sup>Department of Biotechnology and Biomedicine, Technical University of Denmark, Soltofts Plads, 2800 Kongens. Lyngby, Denmark.

<sup>13</sup>School of Bioscience and Biotechnology, South China University of Technology, Guangzhou 510006, China;

\*These authors contributed equally to this work.

†Correspondence should be addressed to H. J. ([jiahuijue@genomics.cn](mailto:jiahuijue@genomics.cn)) or R. W. ([wurf100@126.com](mailto:wurf100@126.com)).

31

32 **Abstract**

33 ***Background***

34 The human uterus is traditionally believed to be sterile, while the vaginal microbiota plays  
35 important roles in fending off pathogens. Emerging evidence demonstrates the presence of  
36 bacteria beyond the vagina. However, a microbiome-wide metagenomic analysis identifying  
37 the overall microorganism communities has been lacking.

38 ***Results***

39 We performed shotgun-sequencing by Illumina platform of 52 samples from the cervical  
40 canal and the peritoneal fluid of Chinese women in reproductive age. Direct annotation of  
41 sequencing reads identified the taxonomy of bacteria, archaea, fungi and viruses, confirming  
42 and extending the results from our previous study. We replicated the findings in another 24  
43 samples from the vagina, the cervical canal, the uterus and the peritoneal fluid using  
44 BGISEQ-500 platform, revealing that microorganisms in the samples from the same  
45 individual were largely shared in the whole reproductive tract. Over 99% human sequences  
46 were detected in the 20GB raw data. After filtering, vaginal microorganisms were well  
47 covered in the generated reproductive tract gene catalogue, while the more diverse upper  
48 reproductive tract microbiota might need greater depth of sequencing and more samples to  
49 meet the full coverage scale.

50 ***Conclusions***

51 Microbiota in unprecedented data for uncharted body site, female upper reproductive tract,  
52 were analyzed in this study. The community results indicated that an intra-individual  
53 continuum of all types of microorganisms gradually changed from the vagina to the peritoneal

1  
2  
3  
4  
5  
6  
7  
8  
9  
10  
11  
12  
13  
14  
15  
16  
17  
18  
19  
20  
21  
22  
23  
24  
25  
26  
27  
28  
29  
30  
31  
32  
33  
34  
35  
36  
37  
38  
39  
40  
41  
42  
43  
44  
45  
46  
47  
48  
49  
50  
51  
52  
53  
54  
55  
56  
57  
58  
59  
60  
61  
62  
63  
64  
65

1 54 fluid. A framework was also established in this study aiming at understanding the  
2  
3 55 implications of the composition and functional potential of this distinct microbial ecosystem  
4  
5  
6 56 in relation to health and disease.  
7

8  
9 57 **Keywords**

10  
11 58 Metagenomics, Female upper reproductive tract  
12  
13  
14  
15 59

16  
17 60 **Background**

18  
19  
20 61 As humans evolved, the female reproductive tract has formed complex and unique structures  
21  
22 62 such as the uterus, cervix and the vagina. The human vagina hosts trillions of bacteria that can  
23  
24  
25 63 significantly impact the health of women and their neonates. The cervix has been regarded to  
26  
27  
28 64 be a perfect barrier between the vagina and uterus leading to the assumption that the upper  
29  
30  
31 65 reproductive tract functions in a sterile environment. However, judging from evidence in  
32  
33  
34 66 insects and other animals, humans are probably no exception with regard to vertical  
35  
36  
37 67 transmission of the mothers' microbiota before birth [1]. Thus, in humans, bacterial DNA has  
38  
39  
40 68 been detected in the placenta [2,3]. Based on our recent analyses using 16S rRNA amplicon  
41  
42  
43 69 sequencing, the upper reproductive tract, including cervix, uterus, fallopian tubes and  
44  
45  
46 70 peritoneal fluid harbor diverse communities of bacteria, though at low abundance [4].  
47

48 71 Recently, the studies of female reproductive tract microbiota have mainly focused on the  
49  
50  
51 72 vagina using 16S rRNA amplicon sequencing [5–7]. Studies using 16S rRNA gene amplicon  
52  
53  
54 73 sequencing have limitations in relation to lower taxonomic resolution and the lack of ability to  
55  
56  
57 74 perform species-specific functional inference. Metagenomic shotgun sequencing can address  
58  
59  
60 75 these limitations, but only a few studies have applied metagenomic shotgun sequencing on the  
61  
62  
63  
64  
65

1 76 vaginal microbiota [8], and no studies have characterized the compositional range of the  
2  
3 77 upper reproductive tract microbiome using metagenomic analysis. The present study is the  
4  
5  
6 78 first to provide metagenomic data from the female upper reproductive tract.  
7  
8  
9 79

## 10 11 80 **Data description**

12  
13  
14 81 Samples of six locations (CL, lower third of vagina; CU, posterior fornix; CV, cervical mucus  
15  
16  
17 82 drawn from the cervical canal; ET, endometrium; FLL and FRL, left and right fallopian tubes;  
18  
19  
20 83 PF, peritoneal fluid from the pouch of Douglas) throughout the female reproductive tract from  
21  
22  
23 84 137 Chinese women of reproductive age, undergoing surgery for conditions not known to  
24  
25  
26 85 involve infection (**Supplementary Table 1**) were collected for this study. 16S rRNA gene  
27  
28  
29 86 amplicon sequencing was performed on 665 of these samples. The results from 476 of these  
30  
31  
32 87 have been published previously [4], and those from the remaining 189 were presented in this  
33  
34  
35 88 study. Two samples (1 CV and 1 CU) were subjected to shotgun sequencing with or without  
36  
37  
38 89 prior removal of human DNA using a commercial kit to test the experimental effect of host  
39  
40  
41 90 sequencing removing (refer to **Methods** section). Then, 25 PF and 25 CV samples were  
42  
43  
44 91 sequenced on the Illumina HiSeq platform using 100 bp paired-end (PE) sequencing (the  
45  
46  
47 92 stringent selection rules of samples, see **Methods** and **Supplementary Fig. 2** for details). For  
48  
49  
50 93 these 52 samples, 20GB of raw data per sample, corresponding to a total of 0.99 TB were  
51  
52  
53 94 generated. Additionally, intra-individual similarity in the vagino-uterine microbiota were also  
54  
55  
56 95 examined basing on 24 samples from different sites of the reproductive tract (CL, CU, CV,  
57  
58  
59 96 ET, PF) in 6 women. These samples were sequenced on the BGISEQ-500 sequencer using  
60  
61  
62 97 100 bp single-end (SE) sequencing and generated 60GB of raw data per sample, totaling 1.40  
63  
64  
65

1 98 TB. The dataset after filtering out low-quality and host reads (refer to **Methods** section) was  
2  
3 99 available on EBI database with the accession number PRJEB24147.  
4  
5

6 100

7  
8  
9 101 **Analyses and Discussion**

10  
11 102 *Metagenomic sequencing*

12  
13  
14 103 According to shotgun-sequencing of vaginal samples by the Human Microbiome Project  
15  
16  
17 104 (HMP) and of placental samples by Aagaard et al., over 90% of the sequences were derived  
18  
19  
20 105 from human host DNA [2,9]. To overcome this problem, we first tested a commercial kit that  
21  
22  
23 106 removes human DNA by binding and precipitating CpG-methylated DNA. Unfortunately,  
24  
25  
26 107 after the kit treatment, a considerable amount (99.9% for CV sample and 79% for CU sample)  
27  
28  
29 108 of host DNA still remained (**Supplementary Fig. 1a**). Besides, the bacteria compositions  
30  
31  
32 109 were varied by kit treatment when comparing with the control group (**Supplementary Fig.**  
33  
34 110 **1b**). We therefore abandoned the strategy of host DNA removal prior to shotgun  
35  
36  
37 111 metagenomics sequencing.

38  
39 112 The sample selection was founded on the data from CV and PF samples [4], which we  
40  
41  
42 113 identified as robust representations of the overall samples. Since higher amounts of DNA is  
43  
44  
45 114 required for shotgun-sequencing results, a more stringent rule was set as the following two  
46  
47  
48 115 criteria: individual sub-clusters representation and sufficient DNA amount (see details in  
49  
50  
51 116 **Methods** section). To follow the former criterion, clustering results based on the relative  
52  
53  
54 117 abundances of OTUs in the PF and CV samples showed that the samples marked with red (all  
55  
56  
57 118 containing DNA > 1 µg) were well distributed amongst all collected samples  
58  
59 119 (**Supplementary Fig. 2**), so these were selected for shotgun-sequencing in this study. As a  
60  
61  
62  
63  
64  
65



1 120 result, 25 PF and 25 CV samples were selected for sequencing using the Illumina HiSeq 4000  
2  
3 121 platform. After quality control, high-quality reads were aligned to hg 19 using SOAP and  
4  
5 122 GRCh38 using DeconSeq to remove human reads (see details in **Methods** section). The  
6  
7  
8 123 average host contamination rate of 99.72% for CV and 99.93% for PF (**Supplementary**  
9  
10  
11 124 **Table 2**), which were lower than that previously reported for placenta samples [2].

12 125 The findings further expanded by inclusion of additional 24 samples subjected to sequencing  
13  
14 126 on the BGISEQ-500 platform, in which we also examined the intra-individual similarity in  
15  
16  
17 127 the vagino-uterine microbiota based on samples from different sites of the reproductive tract  
18  
19  
20 128 (CL, CU, CV, ET, PF). The average host contamination rate for vagina (CL, CU) samples  
21  
22  
23 129 was 96.55%, and lower than those of the CV, ET and PF samples, which all above 99.5%  
24  
25  
26 130 (**Supplementary Table 2**).

27  
28 131 *A diverse microbiome in the cervical canal and the peritoneal fluid of reproductive age*  
29  
30  
31 132 *women*

32  
33  
34 133 To obtain an overview of the overall composition of the vagino-uterine microbiome, we used  
35  
36  
37 134 Kraken to directly assign sequencing reads to all types of microbial taxa [10]. The dominant  
38  
39  
40 135 *Lactobacillus* spp. in CV and *Pseudomonas* spp. in PF were detected in the present study and  
41  
42  
43 136 in corresponded with the previous study. In addition, the microbiome that comprise  
44  
45  
46 137 methane-producing archaea, yeasts, herpesviruses, papillomaviruses, and bacteriophages were  
47  
48  
49 138 also founded (**Fig. 1a, b**).

50  
51  
52 139 The abundance of these taxonomic units varied among samples, and those constituting more  
53  
54  
55 140 than 0.1% of the total reads number were identified in the CV and PF samples from the same  
56  
57  
58 141 individual (**Fig. 1c**).

1 142 To gain further insight into compositional similarities of the microbiota at different sites of  
2  
3 143 the reproductive tract in the same individual, we selected taxa at the family level which  
4  
5  
6 144 fulfilled two criteria: they were presented in at least two sites of the same individual and the  
7  
8  
9 145 relative abundance was higher than 0.1%. Taxa fulfilling these criteria made up more than 45%  
10  
11 146 of the microorganisms presented in the samples across the 6 individuals subjected for this  
12  
13 147 detailed analysis (**Fig. 2**). Lactobacillaceae or Bifidobacteriaceae dominated in vagina (CL  
14  
15 and CU), but not in the upper reproductive tract, where microorganisms such as  
16  
17 148 Pseudomonadaceae, Propionibacteriaceae, Streptococcaceae and Moraxellaceae constituted a  
18  
19 149 notable fraction of the microbiota. In addition, eukaryotes, viruses and archaea, such as  
20  
21 150 Saccharomycetaceae, Herpesviridae, Ferroplasmaceae were also found in the female  
22  
23 151 reproductive tract. The results at the bacterial level are in keeping with our findings in a  
24  
25 152 recent study [4], and the current data further demonstrates an intra-individual continuum of all  
26  
27 153 types of microorganisms that gradually changes from the vagina to the peritoneal fluid.  
28  
29  
30  
31  
32  
33  
34  
35

### 36 155 *Genes from the vagino-uterine microbiota*

37  
38  
39 156 Reference gene catalogs have greatly facilitated analyses of the microbiome, especially the  
40  
41 157 human gut microbiome [11–13]. Here, we established the first gene catalog of the  
42  
43 158 microbiome of the female upper reproductive tract, which comprising 60,699 genes.  
44  
45  
46

47 159 Rarefaction analysis based on gene number revealed a curve approaching saturation with  
48  
49 160 about 23 CV samples (**Fig. 3**). By contrast, rarefaction analysis based on gene numbers in PF  
50  
51 161 samples revealed a curve far from saturation, possibly due to a more diverse microbiota in PF.  
52  
53

54  
55 162 Therefore, with 20GB sequences per sample, vaginal bacteria could be well covered, whereas  
56  
57 163 characterization of bacteria from the upper reproductive tract would require a higher amount  
58  
59  
60  
61  
62  
63  
64  
65

1 164 of sequences and more samples.  
2  
3 165 We annotated the genes in the gene catalog according to the Kyoto Encyclopedia of Genes  
4  
5  
6 166 and Genomes (KEGG) [14]. The matched genes in PF (15,316 genes) were all covered within  
7  
8  
9 167 CV (39,087 genes). Comparing CV and PF in the distribution of KEGG pathways, PF showed  
10  
11  
12 168 a greater proportion of genes in carbohydrate metabolism, replication and repair, membrane  
13  
14  
15 169 transport and drug resistance, whereas the genes involved in translation, energy metabolism  
16  
17  
18 170 and metabolism of cofactors and vitamins were enriched in CV (**Supplementary Fig. 3**). In  
19  
20  
21 171 KO modules, CV showed enrichment of transport systems for thiamine, cystine, teichoic acid,  
22  
23  
24 172 taurine and putative ABC transport systems compared to PF. Regulatory systems of aerobic  
25  
26  
27 173 and anaerobic respiration, osmotic stress response and multicellular behavior control also  
28  
29  
30 174 enriched in CV (**Supplementary Table 3**).

31 175

## 34 176 **Methods**

### 36 177 *Sample description*

39 178 A total of 137 Chinese women of reproductive age, undergoing surgery for conditions not  
40  
41  
42 179 known to involve infection (hysteromyoma, adenomyosis, endometriosis, and  
43  
44  
45 180 salpingemphraxis) were enrolled in this study (**Supplementary Table 1**). Samples were taken  
46  
47  
48 181 from the CL, CU and CV on the day of the clinical visit without any prior disturbance.  
49  
50  
51 182 Depending on the clinical conditions, laparoscopy or laparotomy were performed, and  
52  
53  
54 183 samples from the ET, FLL, FRL and PF were taken during surgery (**Supplementary Table 1**).  
55  
56  
57 184 The study was approved by the institutional review boards at Peking University Shenzhen  
58  
59  
60 185 Hospital and BGI-Shenzhen, and all women provided informed written consent. The subject

1 186 exclusion criteria, sampling method and DNA extraction can be found in [4].

2  
3 187 To test the effect of experimental removal of human DNA, one CU sample and one CV

4  
5  
6 188 sample were used to shotgun sequencing on Illumina HiSeq2000 platform with or without

7  
8  
9 189 prior removal of human DNA, respectively. The NEBNext Microbiome DNA Enrichment Kit

10  
11 190 was used here according to the manufacturer's instructions with a total of 10 µg input DNA

12  
13  
14 191 per sample.

15  
16  
17 192 Then we made a prior selection of samples to undergo shotgun-sequencing. The selection was

18  
19  
20 193 founded on the data from CV and PF samples [4] based on the following two criteria: i)

21  
22 194 samples should represent individual sub-clusters when subjected to clustering based on

23  
24  
25 195 relative abundances of operational taxonomic units (OTUs) from 16S rRNA gene amplicon

26  
27  
28 196 sequencing; ii) the amount of DNA should be above 1 µg. The samples with good scattering

29  
30  
31 197 in different clusters based on the relative abundances of OTUs in the PF and CV samples

32  
33  
34 198 were selected for shotgun-sequencing on Illumina HiSeq4000 platform.

35  
36 199 We replicated the findings in another 24 samples on the BGISEQ-500 platform, where

37  
38  
39 200 additional sites (CL, CU, CV, ET and PF) of 6 women were moreover involved. To meet the

40  
41  
42 201 need of library construction, the amount of DNA in the all 24 samples were above 1 µg. And

43  
44  
45 202 three qualified samples for each woman were set as a threshold.

46  
47 203

48  
49  
50  
51 204 ***Metagenomic shotgun sequencing***

52  
53  
54 205 Library construction and shotgun sequencing using Illumina HiSeq2000/4000 platforms

55  
56  
57 206 (insert size 350 bp; 100 bp of paired-end reads; two replicate libraries were constructed for

58  
59  
60 207 each lane.) and BGISEQ-500 (100 bp of single-end reads; one library was constructed for

61  
62  
63  
64  
65

1 208 each lane) were performed as previously described [15]. The quality control of sequencing  
2  
3 209 data from the HiSeq and BGISEQ platforms were also followed this study. Then, human  
4  
5  
6 210 sequences were eliminated by alignment to the hg19 reference genome using SOAP2.22. As  
7  
8  
9 211 the resulting data still contained human sequences, a more stringent procedure using  
10  
11  
12 212 DeconSeq by aligning data to the GRCh38 reference genome was applied [16].

### 14 213 *Taxonomic assignment of sequencing reads*

16  
17 214 High-quality, non-human sequences were tentatively assigned to microbial taxa using Kraken  
18  
19  
20 215 with default parameters [10]. For pair-end reads Kraken concatenated the pairs together  
21  
22  
23 216 with a single N between the sequences automatically with default parameters and the  
24  
25  
26 217 manual clarified that this software raised the sensitivity by about 3 percentage points  
27  
28 218 over classifying the sequences as single-end reads.

### 30 219 *Construction of a gene catalog*

32  
33  
34 220 The high-quality, non-human sequencing reads of 52 samples sequenced by Illumina HiSeq  
35  
36  
37 221 platforms were *de novo* assembled into contigs using IDBA-UD [17]. We used the same  
38  
39  
40 222 strategy as previous study [12,13], where genes were predicted from the contigs by  
41  
42  
43 223 MetaGeneMark [18], and highly similar genes (95% identity, 90% overlap) were removed as  
44  
45  
46 224 redundancy using CD-HIT [19]. Functional annotations were made by BLASTP (v2.2.24)  
47  
48 225 based on KEGG (v76) databases [14].

50 226

### 53 227 **Author's contributions**

55  
56 228 H.J. and R.W. conceived and directed the project. W.W., J.D., L.Z., H.D., H.T., and R.W.  
57  
58  
59 229 performed the clinical diagnosis, sample collection. C.C., Z.W., F.L., and L.H. performed the

1 230 bioinformatic analyses and prepared display items. C.C., F.L., Z.W., X.Z., J.L. and H.J. wrote  
2  
3 231 the first version of the manuscript. L.M., S.B. and K.K. revised the manuscript. All authors  
4  
5  
6 232 contributed to the final revision of the manuscript.  
7  
8

9 233

#### 11 234 **Acknowledgements**

14 235 The study was supported by the Shenzhen Municipal Government of China  
15  
16 236 (JCYJ20160229172757249, JCYJ20150601090833370), the grant from the Macau  
17  
18  
19 237 Technology Development Fund (102/2016/A3). We gratefully acknowledge colleagues at  
20  
21  
22 238 BGI-Shenzhen for DNA quality control, library construction, sequencing, and helpful  
23  
24  
25 239 discussions.  
26

27  
28 240

#### 31 241 **Competing financial interests**

34 242 The authors declare no competing financial interests.  
35  
36

#### 37 243 **References**

- 40 244 1. Funkhouser LJ, Bordenstein SR. Mom Knows Best: The Universality of Maternal  
41 245 Microbial Transmission. *PLoS Biol.* 2013;11:e1001631.
- 43 246 2. Aagaard K, Ma J, Antony KM, Ganu R, Petrosino J, Versalovic J. The placenta harbors a  
44 247 unique microbiome. *Sci. Transl. Med.* 2014;6:237ra65.
- 47 248 3. Antony KM, Ma J, Mitchell KB, Racusin DA, Versalovic J, Aagaard K. The Preterm  
48 249 Placental Microbiome Varies in Association with Excess Maternal Gestational Weight Gain.  
49 250 *Am J Obs. Gynecol.* Elsevier; 2014;212:653.e1-653.e16.
- 51 251 4. Chen C, Song X, Wei W, Zhong H, Dai J, Lan Z, et al. The microbiota continuum along  
52 252 the female reproductive tract and its relation to uterine-related diseases. *Nat. Commun.*  
53 253 [Internet]. Springer US; 2017;8:875. Available from:  
54 254 <http://dx.doi.org/10.1038/s41467-017-00901-0>
- 57 255 5. Ravel J, Gajer P, Abdo Z, Schneider GM, Koenig SSK, Mcculle SL, et al. Vaginal  
58 256 microbiome of reproductive-age women. *Proc. Natl. Acad. Sci.* 2010;108:4680–7.

- 1  
2  
3  
4  
5  
6  
7  
8  
9  
10  
11  
12  
13  
14  
15  
16  
17  
18  
19  
20  
21  
22  
23  
24  
25  
26  
27  
28  
29  
30  
31  
32  
33  
34  
35  
36  
37  
38  
39  
40  
41  
42  
43  
44  
45  
46  
47  
48  
49  
50  
51  
52  
53  
54  
55  
56  
57  
58  
59  
60  
61  
62  
63  
64  
65
- 257 6. Gajer P, Brotman RM, Bai G, Sakamoto J, Schutte UME, Zhong X, et al. Temporal  
258 Dynamics of the Human Vaginal Microbiota. *Sci. Transl. Med.* 2012;4:132ra52-132ra52.
- 259 7. Ding T, Schloss PD. Dynamics and associations of microbial community types across the  
260 human body. *Nature*. Nature Publishing Group, a division of Macmillan Publishers Limited.  
261 All Rights Reserved.; 2014;509:357–60.
- 262 8. Lloyd-price J, Mahurkar A, Rahnnavard G, Crabtree J, Orvis J, Hall AB, et al. Strains ,  
263 functions and dynamics in the expanded Human Microbiome Project. *Nat. Publ. Gr.* [Internet].  
264 Nature Publishing Group; 2017;550:61–6. Available from:  
265 <http://dx.doi.org/10.1038/nature23889>
- 266 9. Methé BA, Nelson KE, Pop M, Creasy HH, Giglio MG, Huttenhower C, et al. A  
267 framework for human microbiome research. *Nature*. Nature Publishing Group;  
268 2012;486:215–21.
- 269 10. Wood DE, Salzberg SL. Kraken: ultrafast metagenomic sequence classification using  
270 exact alignments. *Genome Biol.* 2014;15:R46.
- 271 11. Wang J, Jia H. Metagenome-wide association studies: fine-mining the microbiome. *Nat.*  
272 *Rev. Microbiol.* 2016;14:508–22.
- 273 12. Li J, Jia H, Cai X, Zhong H, Feng Q, Sunagawa S, et al. An integrated catalog of  
274 reference genes in the human gut microbiome. *Nat. Biotechnol.* 2014;32:834–41.
- 275 13. Xie H, Guo R, Zhong H, Feng Q, Lan Z, Qin B, et al. Shotgun Metagenomics of 250  
276 Adult Twins Reveals Genetic and Environmental Impacts on the Gut Microbiome. *Cell Syst.*  
277 2016;
- 278 14. Kanehisa M, Sato Y, Kawashima M, Furumichi M, Tanabe M. KEGG as a reference  
279 resource for gene and protein annotation. 2016;44:457–62.
- 280 15. Fang C, Zhong H, Lin Y, Chen B, Han M, Ren H, et al. Assessment of the cPAS-based  
281 BGISEQ-500 platform for metagenomic sequencing. *GigaScience.* 2018;1–8.
- 282 16. Schmieder R, Edwards R. Fast identification and removal of sequence contamination from  
283 genomic and metagenomic datasets. *PLoS One.* 2011;6.
- 284 17. Peng Y, Leung HCM, Yiu SM, Chin FYL. IDBA-UD: a de novo assembler for single-cell  
285 and metagenomic sequencing data with highly uneven depth. *Bioinformatics.* 2012;28:1420–  
286 8.
- 287 18. Hyatt D, Locascio PF, Hauser LJ, Uberbacher EC. Gene and translation initiation site  
288 prediction in metagenomic sequences. *Bioinformatics.* 2012;28:2223–30.
- 289 19. Li W, Godzik A. Cd-hit: a fast program for clustering and comparing large sets of protein  
290 or nucleotide sequences. *Bioinformatics.* 2006;22:1658–9.

1 292 **Figure legends**

2  
3  
4 293 **Figure 1: The overall microbiome composition of the cervical canal and the peritoneal**  
5  
6 294 **fluid of reproductive age women.** Cumulative bar charts of the main taxa at domain (a) and  
7  
8  
9 295 family (b) levels in CV and PF samples. (c) Compositional overlap at family level of CV and  
10  
11 296 PF samples from the same individuals. Relative number of reads was calculated as  $N_p =$   
12  
13 297  $\frac{a_p}{a_t} \times m$ , where  $a_p$  is the number of reads within  $p$  taxa in  $a$  sample.  $a_t$  is the total number  
14  
15 298 of reads within  $a$  sample,  $m$  is median number of reads within all 50 samples. When  $p$  taxa  
16  
17 299 is shared by CV and PF samples from the same individuals, and at the same time both  
18  
19 300  $N_p$  values are higher than  $0.1\% \times m$ , the  $p$  taxa is included in the cumulative bar charts.  
20  
21 301 Taxa names (b, c) in black, purple, and blue denote bacteria, eukaryote and viruses,  
22  
23 302 respectively.  
24  
25  
26  
27  
28  
29  
30

31  
32 303 **Figure 2: Composition of the vagino-uterine microbiota.** (a, c, e, g, i, k) Venn diagram  
33  
34 304 depicting shared taxa at the family levels in samples collected at different sites in the same  
35  
36 305 individual. (b, d, f, h, k, l) Cumulative bar charts of the taxa with relative abundance higher  
37  
38 306 than 0.1% and present in at least two sites of the same individual. Taxa names (b, c) in black,  
39  
40 307 purple, blue, and grey denote bacteria, eukaryote, viruses and archaea, respectively.  
41  
42  
43  
44  
45  
46

47 308 **Figure 3: Rarefaction of microbial gene content in CV (a) and PF (b) samples.** The  
48  
49 309 number of genes in each group was calculated after 100 random samplings with replacement.  
50  
51 310 Boxes denote the interquartile range (IQR) between the first and third quartiles (25th and 75th  
52  
53 311 percentiles, respectively) and the line inside denotes the median. Whiskers denote the lowest  
54  
55 312 and highest values within 1.5 times IQR from the first and third quartiles, respectively.  
56  
57  
58  
59  
60  
61  
62  
63  
64  
65



1 313 Circles denote outliers beyond the whiskers.

2  
3  
4 314 **Supplementary Figure legends**

5  
6  
7  
8 315 **Supplementary Figure 1: Evaluation of the NEBNext Microbiome DNA Enrichment Kit**

9  
10 316 **by two comparative strategies.** Sample names suffixed by “-HR” represent DNA samples

11  
12 317 that were treated with the kit for removal of host DNA before shotgun sequencing, while

13  
14 318 sample names suffixed by A represent DNA samples that were subjected to shotgun

15  
16 319 sequencing directly **(a)**. The table data shows the obtained read number, and remaining reads

17  
18 320 after removal of host DNA reads in the two samples. **b)** Influence of host DNA presence on

19  
20 321 bacterial DNA identification during shotgun sequencing. The plots display the compositional

21  
22 322 difference amongst major bacteria genera in samples with and without (-HR) host DNA

23  
24 323 presence. Data were analyzed by mapping reads to the ICG bacterial reference gene catalog

25  
26 324 [12].

27  
28  
29  
30 325 **Supplementary Figure 2: Samples selected for metagenomic sequencing.** Average linkage

31  
32 326 clustering of CV **(a)** and PF **(b)** samples based on the relative abundances of OTUs. Samples

33  
34 327 which represent individual sub-clusters and hold DNA amounts above 1 µg were selected for

35  
36 328 shotgun-sequencing (red).

37  
38  
39  
40 329 **Supplementary Figure 3: KEGG pathway classification of the vagino-uterine**

41  
42 330 **microbiome.** Comparison of CV (red) and PF (blue) data based on KEGG annotation, which

43  
44 331 emphasizes functional similarity of the CV and PF microbiota.

a

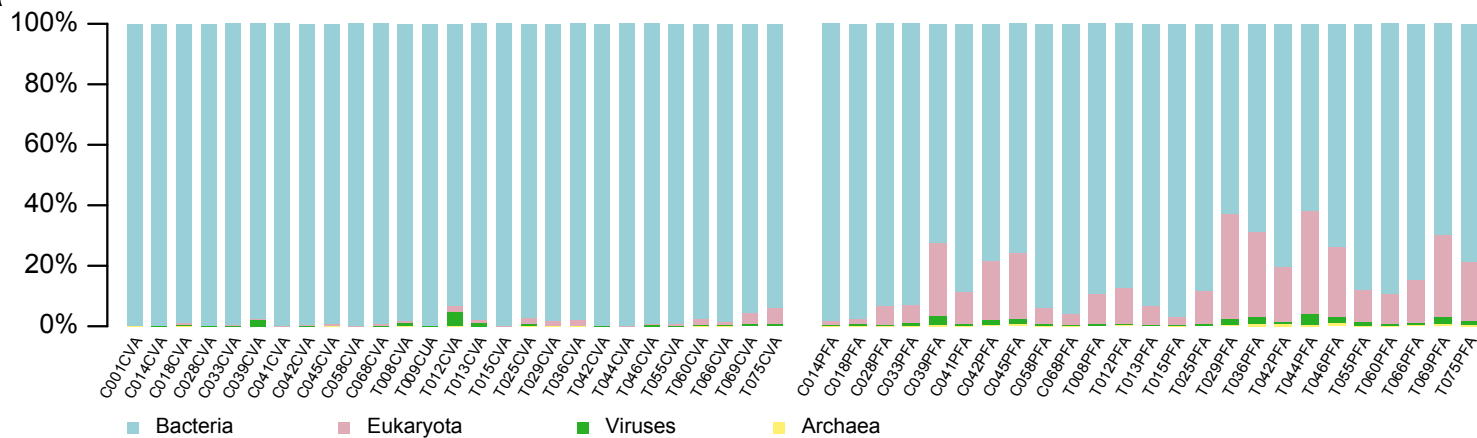

b

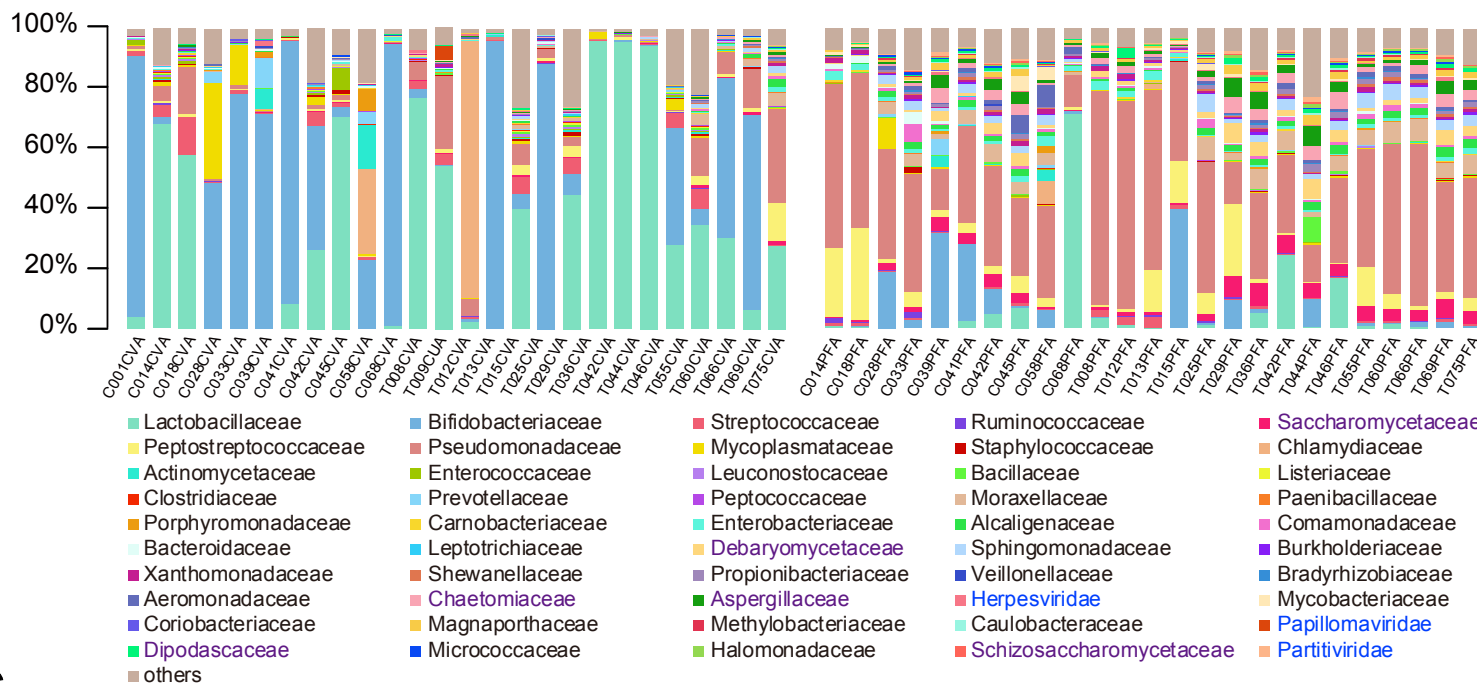

c

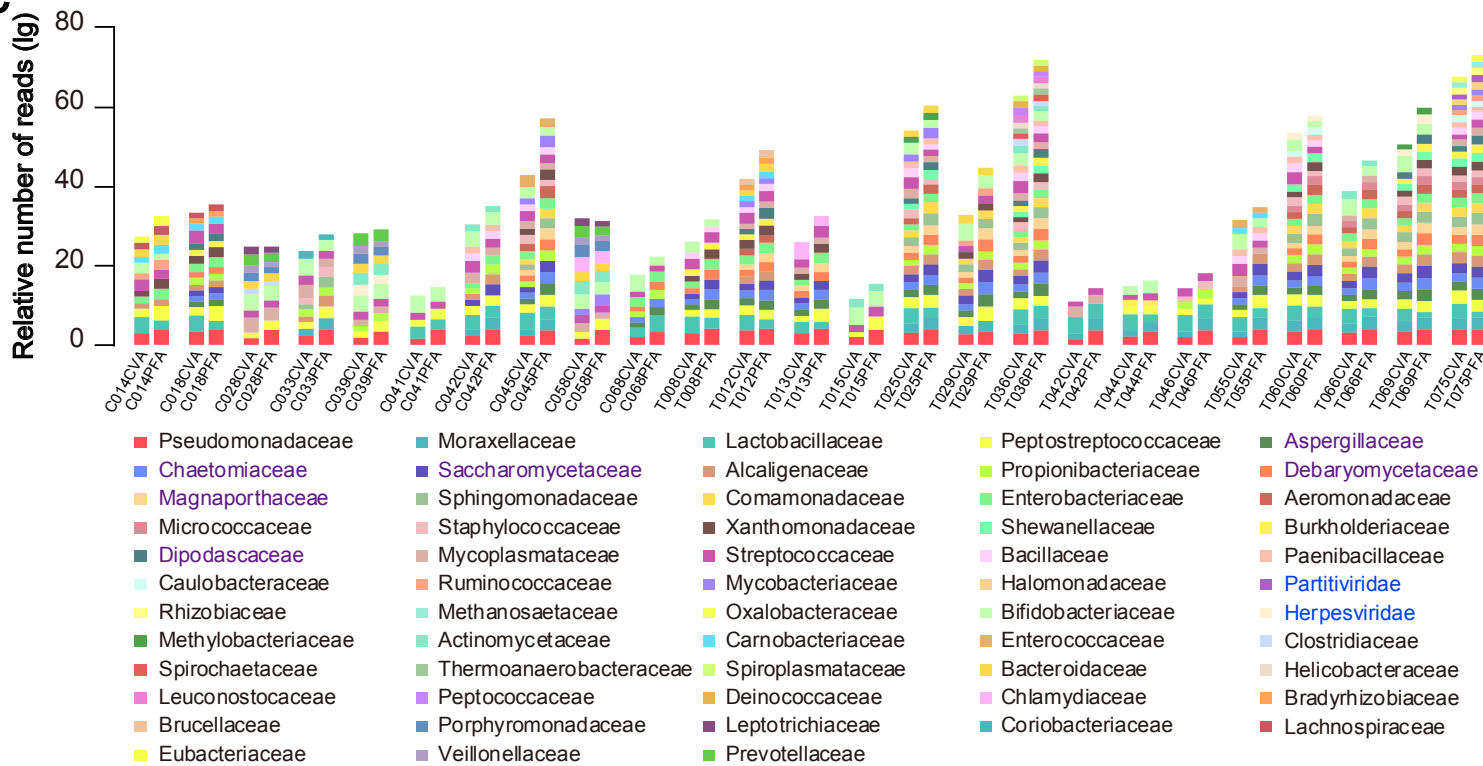

Figure 2

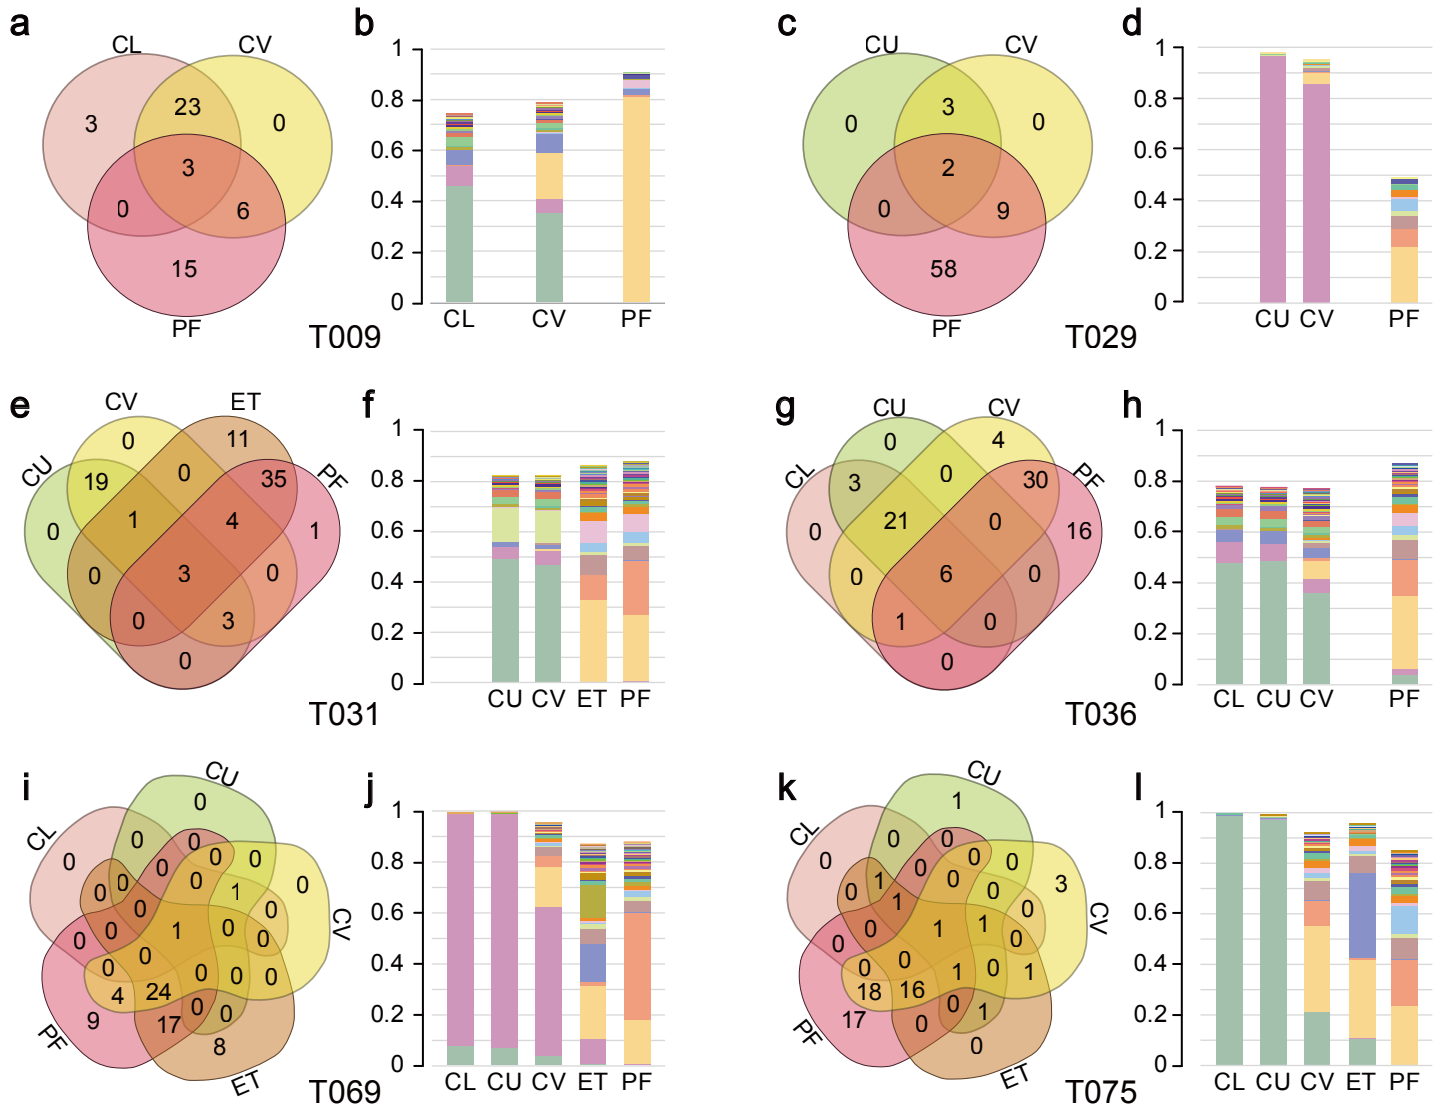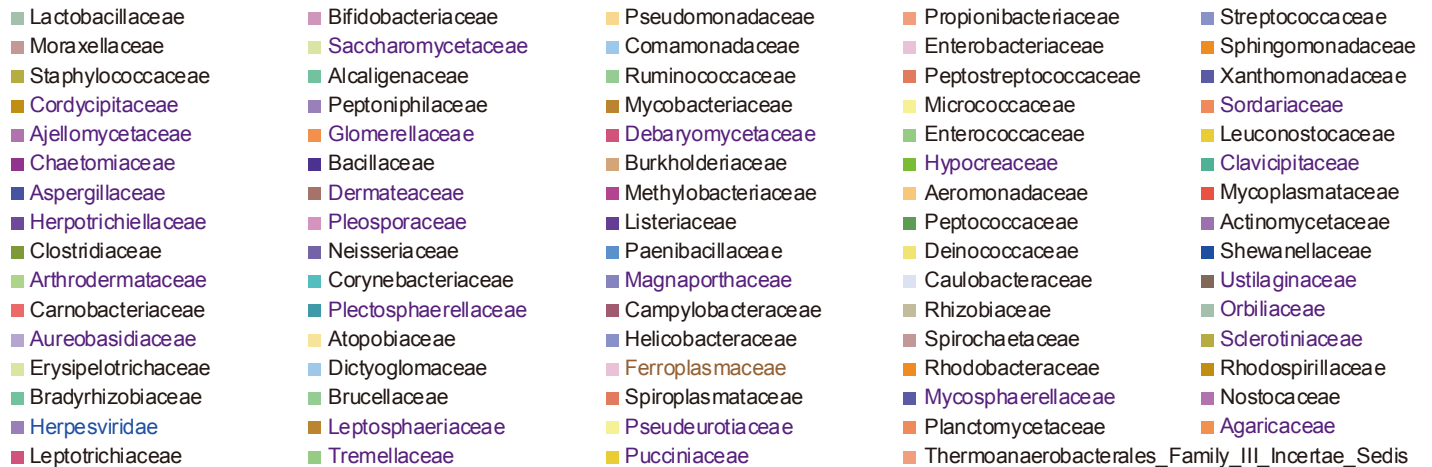

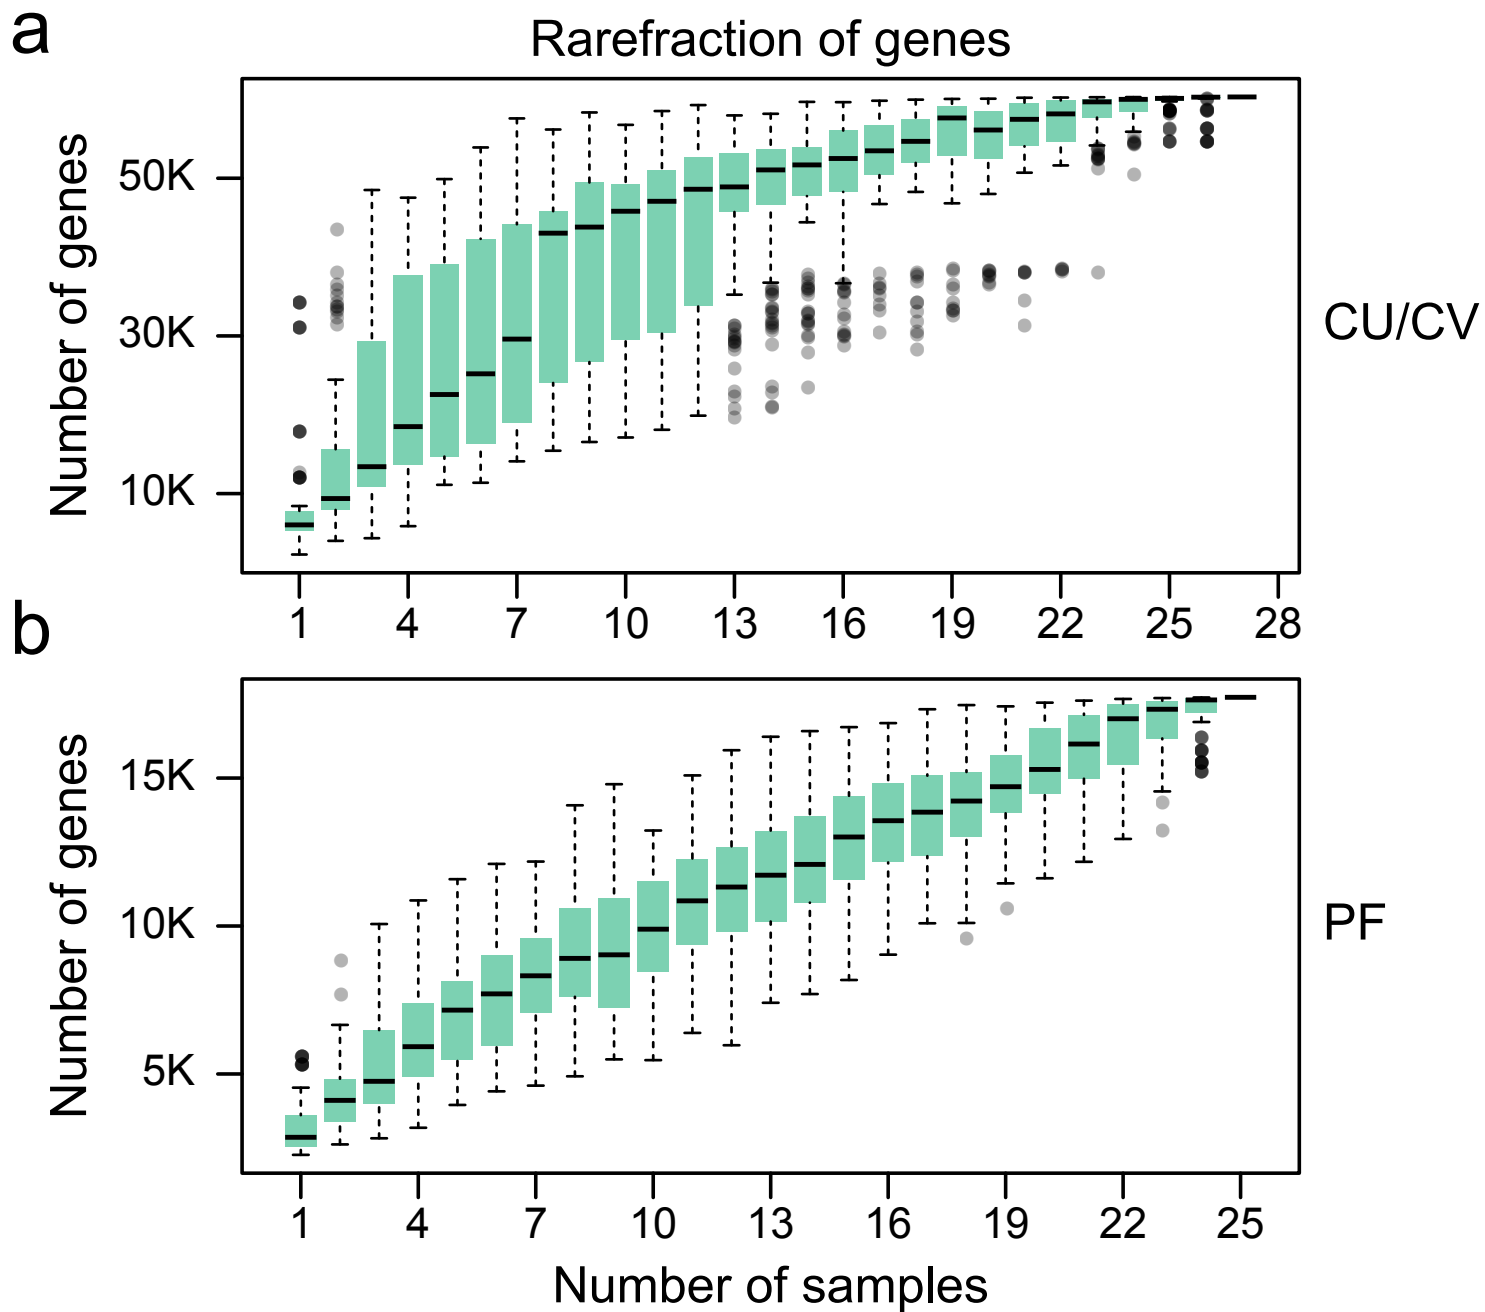

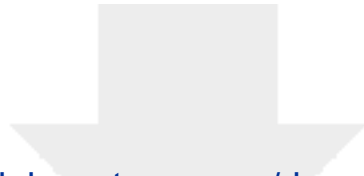

Click here to access/download  
**Supplementary Material**  
SFIG1-20180126.pdf

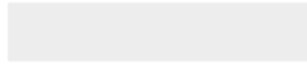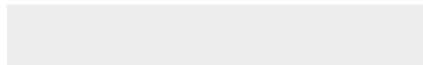



Click here to access/download  
**Supplementary Material**  
SFIG2-20180126.pdf





Click here to access/download  
**Supplementary Material**  
SFIG3.pdf



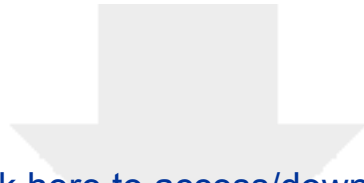

[Click here to access/download](#)

**Supplementary Material**

Supplementary Table 1-20180126.xlsx

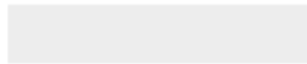



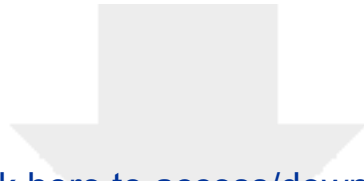

[Click here to access/download](#)

**Supplementary Material**

Supplementary Table 2-20180126.xlsx

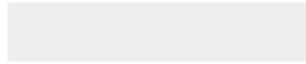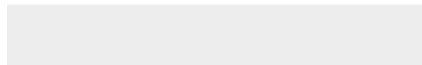



Click here to access/download  
**Supplementary Material**  
Supplementary Table 3.xlsx

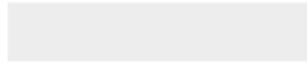



Click here to access/download  
**Supplementary Material**  
response\_letter.docx



Supplement: giy107_giga-d-18-00184_original_submission.pdf [file giy107_giga-d-18-00184_original_submission.pdf]
