# Supplementary material for: The metagenome of the female upper reproductive tract
Source: PubMed Central journal article supplement (PMC6177736; doi:10.1093/gigascience/giy107), 2018-09-06

|                                                      |                                                                                                                                                                                                                                                                                                                                                                                                                                                                                                                                                                                                                                                                                                                                                                                                                                                                                                                                                                                                                                                                                                                                                                                                                                                                                                                                                                                                                                                                                                                                                                                                                                                                                                                                                                                                                                                                                   |               |
|------------------------------------------------------|-----------------------------------------------------------------------------------------------------------------------------------------------------------------------------------------------------------------------------------------------------------------------------------------------------------------------------------------------------------------------------------------------------------------------------------------------------------------------------------------------------------------------------------------------------------------------------------------------------------------------------------------------------------------------------------------------------------------------------------------------------------------------------------------------------------------------------------------------------------------------------------------------------------------------------------------------------------------------------------------------------------------------------------------------------------------------------------------------------------------------------------------------------------------------------------------------------------------------------------------------------------------------------------------------------------------------------------------------------------------------------------------------------------------------------------------------------------------------------------------------------------------------------------------------------------------------------------------------------------------------------------------------------------------------------------------------------------------------------------------------------------------------------------------------------------------------------------------------------------------------------------|---------------|
| <b>Manuscript Number:</b>                            | GIGA-D-18-00184R1                                                                                                                                                                                                                                                                                                                                                                                                                                                                                                                                                                                                                                                                                                                                                                                                                                                                                                                                                                                                                                                                                                                                                                                                                                                                                                                                                                                                                                                                                                                                                                                                                                                                                                                                                                                                                                                                 |               |
| <b>Full Title:</b>                                   | The metagenome of the female upper reproductive tract                                                                                                                                                                                                                                                                                                                                                                                                                                                                                                                                                                                                                                                                                                                                                                                                                                                                                                                                                                                                                                                                                                                                                                                                                                                                                                                                                                                                                                                                                                                                                                                                                                                                                                                                                                                                                             |               |
| <b>Article Type:</b>                                 | Research                                                                                                                                                                                                                                                                                                                                                                                                                                                                                                                                                                                                                                                                                                                                                                                                                                                                                                                                                                                                                                                                                                                                                                                                                                                                                                                                                                                                                                                                                                                                                                                                                                                                                                                                                                                                                                                                          |               |
| <b>Funding Information:</b>                          | Shenzhen Municipal Government of China (JCYJ20160229172757249)                                                                                                                                                                                                                                                                                                                                                                                                                                                                                                                                                                                                                                                                                                                                                                                                                                                                                                                                                                                                                                                                                                                                                                                                                                                                                                                                                                                                                                                                                                                                                                                                                                                                                                                                                                                                                    | Mrs Chen Chen |
|                                                      | Shenzhen Municipal Government of China (JCYJ20150601090833370)                                                                                                                                                                                                                                                                                                                                                                                                                                                                                                                                                                                                                                                                                                                                                                                                                                                                                                                                                                                                                                                                                                                                                                                                                                                                                                                                                                                                                                                                                                                                                                                                                                                                                                                                                                                                                    | Mrs Chen Chen |
|                                                      | Macau Technology Development Fund (102/2016/A3)                                                                                                                                                                                                                                                                                                                                                                                                                                                                                                                                                                                                                                                                                                                                                                                                                                                                                                                                                                                                                                                                                                                                                                                                                                                                                                                                                                                                                                                                                                                                                                                                                                                                                                                                                                                                                                   | Mrs Chen Chen |
| <b>Abstract:</b>                                     | <p><b>Background</b></p> <p>The human uterus is traditionally believed to be sterile, while the vaginal microbiota plays important role in fending off pathogens. Emerging evidence demonstrates the presence of bacteria beyond the vagina. However, a microbiome-wide metagenomic analysis identifying the overall microorganism communities has been lacking.</p> <p><b>Results</b></p> <p>We performed shotgun-sequencing by Illumina platform of 52 samples from the cervical canal and the peritoneal fluid of Chinese women in reproductive age. Direct annotation of sequencing reads identified the taxonomy of bacteria, archaea, fungi and viruses, confirming and extending the results from our previous study. We replicated the findings in another 24 samples from the vagina, the cervical canal, the uterus and the peritoneal fluid using BGISEQ-500 platform, revealing that microorganisms in the samples from the same individual were largely shared in the whole reproductive tract. Over 99% human sequences were detected in the 20GB raw data. After filtering, vaginal microorganisms were well covered in the generated reproductive tract gene catalogue, while the more diverse upper reproductive tract microbiota might need greater depth of sequencing and more samples to meet the full coverage scale.</p> <p><b>Conclusions</b></p> <p>Microbiota in unprecedented data for uncharted body site, female upper reproductive tract, were analyzed in this study. The community results indicated that an intra-individual continuum of all types of microorganisms gradually changed from the vagina to the peritoneal fluid. A framework was also established in this study aiming at understanding the implications of the composition and functional potential of this distinct microbial ecosystem in relation to health and disease.</p> |               |
| <b>Corresponding Author:</b>                         | Huijue Jia                                                                                                                                                                                                                                                                                                                                                                                                                                                                                                                                                                                                                                                                                                                                                                                                                                                                                                                                                                                                                                                                                                                                                                                                                                                                                                                                                                                                                                                                                                                                                                                                                                                                                                                                                                                                                                                                        |               |
|                                                      | CHINA                                                                                                                                                                                                                                                                                                                                                                                                                                                                                                                                                                                                                                                                                                                                                                                                                                                                                                                                                                                                                                                                                                                                                                                                                                                                                                                                                                                                                                                                                                                                                                                                                                                                                                                                                                                                                                                                             |               |
| <b>Corresponding Author Secondary Information:</b>   |                                                                                                                                                                                                                                                                                                                                                                                                                                                                                                                                                                                                                                                                                                                                                                                                                                                                                                                                                                                                                                                                                                                                                                                                                                                                                                                                                                                                                                                                                                                                                                                                                                                                                                                                                                                                                                                                                   |               |
| <b>Corresponding Author's Institution:</b>           |                                                                                                                                                                                                                                                                                                                                                                                                                                                                                                                                                                                                                                                                                                                                                                                                                                                                                                                                                                                                                                                                                                                                                                                                                                                                                                                                                                                                                                                                                                                                                                                                                                                                                                                                                                                                                                                                                   |               |
| <b>Corresponding Author's Secondary Institution:</b> |                                                                                                                                                                                                                                                                                                                                                                                                                                                                                                                                                                                                                                                                                                                                                                                                                                                                                                                                                                                                                                                                                                                                                                                                                                                                                                                                                                                                                                                                                                                                                                                                                                                                                                                                                                                                                                                                                   |               |
| <b>First Author:</b>                                 | Chen Chen                                                                                                                                                                                                                                                                                                                                                                                                                                                                                                                                                                                                                                                                                                                                                                                                                                                                                                                                                                                                                                                                                                                                                                                                                                                                                                                                                                                                                                                                                                                                                                                                                                                                                                                                                                                                                                                                         |               |
| <b>First Author Secondary Information:</b>           |                                                                                                                                                                                                                                                                                                                                                                                                                                                                                                                                                                                                                                                                                                                                                                                                                                                                                                                                                                                                                                                                                                                                                                                                                                                                                                                                                                                                                                                                                                                                                                                                                                                                                                                                                                                                                                                                                   |               |
| <b>Order of Authors:</b>                             | Chen Chen                                                                                                                                                                                                                                                                                                                                                                                                                                                                                                                                                                                                                                                                                                                                                                                                                                                                                                                                                                                                                                                                                                                                                                                                                                                                                                                                                                                                                                                                                                                                                                                                                                                                                                                                                                                                                                                                         |               |
|                                                      | Fei Li                                                                                                                                                                                                                                                                                                                                                                                                                                                                                                                                                                                                                                                                                                                                                                                                                                                                                                                                                                                                                                                                                                                                                                                                                                                                                                                                                                                                                                                                                                                                                                                                                                                                                                                                                                                                                                                                            |               |
|                                                      | Weixia Wei                                                                                                                                                                                                                                                                                                                                                                                                                                                                                                                                                                                                                                                                                                                                                                                                                                                                                                                                                                                                                                                                                                                                                                                                                                                                                                                                                                                                                                                                                                                                                                                                                                                                                                                                                                                                                                                                        |               |
|                                                      | Zirong Wang                                                                                                                                                                                                                                                                                                                                                                                                                                                                                                                                                                                                                                                                                                                                                                                                                                                                                                                                                                                                                                                                                                                                                                                                                                                                                                                                                                                                                                                                                                                                                                                                                                                                                                                                                                                                                                                                       |               |
|                                                      | Juanjuan Dai                                                                                                                                                                                                                                                                                                                                                                                                                                                                                                                                                                                                                                                                                                                                                                                                                                                                                                                                                                                                                                                                                                                                                                                                                                                                                                                                                                                                                                                                                                                                                                                                                                                                                                                                                                                                                                                                      |               |
|                                                      | Lilan Hao                                                                                                                                                                                                                                                                                                                                                                                                                                                                                                                                                                                                                                                                                                                                                                                                                                                                                                                                                                                                                                                                                                                                                                                                                                                                                                                                                                                                                                                                                                                                                                                                                                                                                                                                                                                                                                                                         |               |

|                                                |                                                                                                                                                                                                                                                                                                                                                                                                                                                                                                                                                                                                                                                                                                                                                                                                                                                                                                                                                                                                                                                                                                                                                                                                                                                                                                                                                                                                                                                                                                                                                                                                                                                                                                                                                                                                                                                                                                                                                                                                                                                                                                                                                                                                                                                                                                                                                                                                                                                                                                                                                                                                                                                                                                                                                     |
|------------------------------------------------|-----------------------------------------------------------------------------------------------------------------------------------------------------------------------------------------------------------------------------------------------------------------------------------------------------------------------------------------------------------------------------------------------------------------------------------------------------------------------------------------------------------------------------------------------------------------------------------------------------------------------------------------------------------------------------------------------------------------------------------------------------------------------------------------------------------------------------------------------------------------------------------------------------------------------------------------------------------------------------------------------------------------------------------------------------------------------------------------------------------------------------------------------------------------------------------------------------------------------------------------------------------------------------------------------------------------------------------------------------------------------------------------------------------------------------------------------------------------------------------------------------------------------------------------------------------------------------------------------------------------------------------------------------------------------------------------------------------------------------------------------------------------------------------------------------------------------------------------------------------------------------------------------------------------------------------------------------------------------------------------------------------------------------------------------------------------------------------------------------------------------------------------------------------------------------------------------------------------------------------------------------------------------------------------------------------------------------------------------------------------------------------------------------------------------------------------------------------------------------------------------------------------------------------------------------------------------------------------------------------------------------------------------------------------------------------------------------------------------------------------------------|
|                                                | Liju Song                                                                                                                                                                                                                                                                                                                                                                                                                                                                                                                                                                                                                                                                                                                                                                                                                                                                                                                                                                                                                                                                                                                                                                                                                                                                                                                                                                                                                                                                                                                                                                                                                                                                                                                                                                                                                                                                                                                                                                                                                                                                                                                                                                                                                                                                                                                                                                                                                                                                                                                                                                                                                                                                                                                                           |
|                                                | Xiaowei Zhang                                                                                                                                                                                                                                                                                                                                                                                                                                                                                                                                                                                                                                                                                                                                                                                                                                                                                                                                                                                                                                                                                                                                                                                                                                                                                                                                                                                                                                                                                                                                                                                                                                                                                                                                                                                                                                                                                                                                                                                                                                                                                                                                                                                                                                                                                                                                                                                                                                                                                                                                                                                                                                                                                                                                       |
|                                                | Liping Zeng                                                                                                                                                                                                                                                                                                                                                                                                                                                                                                                                                                                                                                                                                                                                                                                                                                                                                                                                                                                                                                                                                                                                                                                                                                                                                                                                                                                                                                                                                                                                                                                                                                                                                                                                                                                                                                                                                                                                                                                                                                                                                                                                                                                                                                                                                                                                                                                                                                                                                                                                                                                                                                                                                                                                         |
|                                                | Hui Du                                                                                                                                                                                                                                                                                                                                                                                                                                                                                                                                                                                                                                                                                                                                                                                                                                                                                                                                                                                                                                                                                                                                                                                                                                                                                                                                                                                                                                                                                                                                                                                                                                                                                                                                                                                                                                                                                                                                                                                                                                                                                                                                                                                                                                                                                                                                                                                                                                                                                                                                                                                                                                                                                                                                              |
|                                                | Huiru Tang                                                                                                                                                                                                                                                                                                                                                                                                                                                                                                                                                                                                                                                                                                                                                                                                                                                                                                                                                                                                                                                                                                                                                                                                                                                                                                                                                                                                                                                                                                                                                                                                                                                                                                                                                                                                                                                                                                                                                                                                                                                                                                                                                                                                                                                                                                                                                                                                                                                                                                                                                                                                                                                                                                                                          |
|                                                | Na Liu                                                                                                                                                                                                                                                                                                                                                                                                                                                                                                                                                                                                                                                                                                                                                                                                                                                                                                                                                                                                                                                                                                                                                                                                                                                                                                                                                                                                                                                                                                                                                                                                                                                                                                                                                                                                                                                                                                                                                                                                                                                                                                                                                                                                                                                                                                                                                                                                                                                                                                                                                                                                                                                                                                                                              |
|                                                | Huanming Yang                                                                                                                                                                                                                                                                                                                                                                                                                                                                                                                                                                                                                                                                                                                                                                                                                                                                                                                                                                                                                                                                                                                                                                                                                                                                                                                                                                                                                                                                                                                                                                                                                                                                                                                                                                                                                                                                                                                                                                                                                                                                                                                                                                                                                                                                                                                                                                                                                                                                                                                                                                                                                                                                                                                                       |
|                                                | Jian Wang                                                                                                                                                                                                                                                                                                                                                                                                                                                                                                                                                                                                                                                                                                                                                                                                                                                                                                                                                                                                                                                                                                                                                                                                                                                                                                                                                                                                                                                                                                                                                                                                                                                                                                                                                                                                                                                                                                                                                                                                                                                                                                                                                                                                                                                                                                                                                                                                                                                                                                                                                                                                                                                                                                                                           |
|                                                | Lise Madsen                                                                                                                                                                                                                                                                                                                                                                                                                                                                                                                                                                                                                                                                                                                                                                                                                                                                                                                                                                                                                                                                                                                                                                                                                                                                                                                                                                                                                                                                                                                                                                                                                                                                                                                                                                                                                                                                                                                                                                                                                                                                                                                                                                                                                                                                                                                                                                                                                                                                                                                                                                                                                                                                                                                                         |
|                                                | Susanne Brix                                                                                                                                                                                                                                                                                                                                                                                                                                                                                                                                                                                                                                                                                                                                                                                                                                                                                                                                                                                                                                                                                                                                                                                                                                                                                                                                                                                                                                                                                                                                                                                                                                                                                                                                                                                                                                                                                                                                                                                                                                                                                                                                                                                                                                                                                                                                                                                                                                                                                                                                                                                                                                                                                                                                        |
|                                                | Karsten Kristiansen                                                                                                                                                                                                                                                                                                                                                                                                                                                                                                                                                                                                                                                                                                                                                                                                                                                                                                                                                                                                                                                                                                                                                                                                                                                                                                                                                                                                                                                                                                                                                                                                                                                                                                                                                                                                                                                                                                                                                                                                                                                                                                                                                                                                                                                                                                                                                                                                                                                                                                                                                                                                                                                                                                                                 |
|                                                | Xun Xu                                                                                                                                                                                                                                                                                                                                                                                                                                                                                                                                                                                                                                                                                                                                                                                                                                                                                                                                                                                                                                                                                                                                                                                                                                                                                                                                                                                                                                                                                                                                                                                                                                                                                                                                                                                                                                                                                                                                                                                                                                                                                                                                                                                                                                                                                                                                                                                                                                                                                                                                                                                                                                                                                                                                              |
|                                                | Junhua Li                                                                                                                                                                                                                                                                                                                                                                                                                                                                                                                                                                                                                                                                                                                                                                                                                                                                                                                                                                                                                                                                                                                                                                                                                                                                                                                                                                                                                                                                                                                                                                                                                                                                                                                                                                                                                                                                                                                                                                                                                                                                                                                                                                                                                                                                                                                                                                                                                                                                                                                                                                                                                                                                                                                                           |
|                                                | Ruifang Wu                                                                                                                                                                                                                                                                                                                                                                                                                                                                                                                                                                                                                                                                                                                                                                                                                                                                                                                                                                                                                                                                                                                                                                                                                                                                                                                                                                                                                                                                                                                                                                                                                                                                                                                                                                                                                                                                                                                                                                                                                                                                                                                                                                                                                                                                                                                                                                                                                                                                                                                                                                                                                                                                                                                                          |
|                                                | Huijue Jia                                                                                                                                                                                                                                                                                                                                                                                                                                                                                                                                                                                                                                                                                                                                                                                                                                                                                                                                                                                                                                                                                                                                                                                                                                                                                                                                                                                                                                                                                                                                                                                                                                                                                                                                                                                                                                                                                                                                                                                                                                                                                                                                                                                                                                                                                                                                                                                                                                                                                                                                                                                                                                                                                                                                          |
| <b>Order of Authors Secondary Information:</b> |                                                                                                                                                                                                                                                                                                                                                                                                                                                                                                                                                                                                                                                                                                                                                                                                                                                                                                                                                                                                                                                                                                                                                                                                                                                                                                                                                                                                                                                                                                                                                                                                                                                                                                                                                                                                                                                                                                                                                                                                                                                                                                                                                                                                                                                                                                                                                                                                                                                                                                                                                                                                                                                                                                                                                     |
| <b>Response to Reviewers:</b>                  | <p>Reviewer reports:</p> <p>Reviewer #1: The manuscript has vastly improved since the first submission, although some additional information and language editing is required.</p> <p>I would like to thank the authors for including more in-depth information about the functional data; i think p-values for the aforementioned differences in gene families have to be provided; maybe marking the significant differences on the figure. I also think that since this is actually the most novel data in the paper, the Supplementary Figure 3 should be moved to the main body of the paper.</p> <p>We thank reviewer for the valuable comment. For the functional data, we evaluated the difference between the CV and PF by comparing all the functional genes from the built catalogues instead of the individual samples to avoid the deviation. Hence, we can't do the statistical analysis, such as p-value calculation. Additionally, we agreed with the suggestion from reviewer and moved Supplementary Figure 3 to the main body to make the paper more fulness and integrated.</p> <p>Authors have enough of samples to claim the gradient in microbiota over the reproductory tract; as well as enough of samples to perform functional comparisons between PF and CU samples, but believe that these data is not enough to address differences in alpha- and beta-diversity between PF/CU. I find this argument a little vague and I strongly believe that the paper would benefit from including this information, but since it initially was just my suggestion to the authors, they are free to ignore it.</p> <p>We would like to thank the reviewer's question. We consider that the sample number of PF is enough to explain the microbiota and the community function since the microbiota and its function were mainly dressed by the dominate species which could be fully explained by the data achieved from these samples. However, we claim that it is not enough to address differences in alpha- and beta-diversity between PF/CU because that the rarefaction curve of PF did not reach the saturation, while CU did. That means some species may still not been detected in the PF samples and this will cause the deviation of the bacterial alpha- and beta-diversity results.</p> <p>Line 161, figure 3, the PF line is not far from reaching the plateau - it does seem that the line is approaching the asymptote, so i believe that 'far from saturation' is an overstatement and should be toned down.</p> <p>We agree with the suggestion raised from the reviewer. After the double checking, we totally agreed with the reviewer and revised this statement to make it toned down (Line 160-162).</p> |

|                                                                                                                                                                                                                                                                                                                                                                                                                                    |                                                                                                                                                                                                                                                                                                                                                                                                                                                                                                                                                                                                                                                                                                                                                                                                                                                                                                                                                                                                                                                                                                                                                                                                                                                                                                                                                                                                                                                                                                                                                                                                                                                                                                                                                                                                                                                                                                                                                                                                                                                                                                |
|------------------------------------------------------------------------------------------------------------------------------------------------------------------------------------------------------------------------------------------------------------------------------------------------------------------------------------------------------------------------------------------------------------------------------------|------------------------------------------------------------------------------------------------------------------------------------------------------------------------------------------------------------------------------------------------------------------------------------------------------------------------------------------------------------------------------------------------------------------------------------------------------------------------------------------------------------------------------------------------------------------------------------------------------------------------------------------------------------------------------------------------------------------------------------------------------------------------------------------------------------------------------------------------------------------------------------------------------------------------------------------------------------------------------------------------------------------------------------------------------------------------------------------------------------------------------------------------------------------------------------------------------------------------------------------------------------------------------------------------------------------------------------------------------------------------------------------------------------------------------------------------------------------------------------------------------------------------------------------------------------------------------------------------------------------------------------------------------------------------------------------------------------------------------------------------------------------------------------------------------------------------------------------------------------------------------------------------------------------------------------------------------------------------------------------------------------------------------------------------------------------------------------------------|
|                                                                                                                                                                                                                                                                                                                                                                                                                                    | <p>Reviewer #2: Still think that a quick read for English would be useful for this manuscript though the writing has improved. Examples of writing that needs correcting are as follows:<br/> Lines 34-35 in the abstract: "the vaginal microbiota plays important roles ... " should be "role"; Line 91 "(the stringent selection rules ..." should be "(for the stringent selection rules ..."<br/> We thank reviewer very much for the carefully reading and correction. We revised the manuscript according to the comments and checked the English carefully throughout the manuscript.</p> <p>The clustering process is still not described. Did the authors use hierarchical clustering, kmeans clustering .... What was the cutoff used to identify the clusters? Based on this and on figure Sup Fig 2 I don't believe that they achieved individual sub-cluster representation.<br/> We thank reviewer for pointing out this information which should not be omitted. We applied centroid-linkage method for the hierarchical clustering in this study and the detailed information has been added in the methods (Line 194-195). After hierarchical clustering, we selected the samples with enough DNA amount in each sub-cluster as the representative candidates to do the further analysis.</p> <p>Line 92 Supplementary Figure 2 does not provide details of the stringent selection rules.<br/> We would like to thank the reviewer for the question. The reason why we cite Supplementary Fig. 2 here is one of the selection rules is according to the results of the clustering which presented in the Supplementary Fig. 2. However, as the reviewer pointed out, this figure did not provide the details of the stringent selection rules, so we deleted the citation in line 92.</p> <p>Line 136 The authors should provide the reference to the "previous" study when they mention it.<br/> We are grateful for the reviewer's suggestion. We agreed with the reviewer and added the reference here, which is our recent study using 16S rRNA amplicon sequencing.</p> |
| <b>Additional Information:</b>                                                                                                                                                                                                                                                                                                                                                                                                     |                                                                                                                                                                                                                                                                                                                                                                                                                                                                                                                                                                                                                                                                                                                                                                                                                                                                                                                                                                                                                                                                                                                                                                                                                                                                                                                                                                                                                                                                                                                                                                                                                                                                                                                                                                                                                                                                                                                                                                                                                                                                                                |
| <b>Question</b>                                                                                                                                                                                                                                                                                                                                                                                                                    | <b>Response</b>                                                                                                                                                                                                                                                                                                                                                                                                                                                                                                                                                                                                                                                                                                                                                                                                                                                                                                                                                                                                                                                                                                                                                                                                                                                                                                                                                                                                                                                                                                                                                                                                                                                                                                                                                                                                                                                                                                                                                                                                                                                                                |
| Are you submitting this manuscript to a special series or article collection?                                                                                                                                                                                                                                                                                                                                                      | No                                                                                                                                                                                                                                                                                                                                                                                                                                                                                                                                                                                                                                                                                                                                                                                                                                                                                                                                                                                                                                                                                                                                                                                                                                                                                                                                                                                                                                                                                                                                                                                                                                                                                                                                                                                                                                                                                                                                                                                                                                                                                             |
| <p><b>Experimental design and statistics</b></p> <p>Full details of the experimental design and statistical methods used should be given in the Methods section, as detailed in our <a href="#">Minimum Standards Reporting Checklist</a>. Information essential to interpreting the data presented should be made available in the figure legends.</p> <p>Have you included all the information requested in your manuscript?</p> | Yes                                                                                                                                                                                                                                                                                                                                                                                                                                                                                                                                                                                                                                                                                                                                                                                                                                                                                                                                                                                                                                                                                                                                                                                                                                                                                                                                                                                                                                                                                                                                                                                                                                                                                                                                                                                                                                                                                                                                                                                                                                                                                            |
| <b>Resources</b>                                                                                                                                                                                                                                                                                                                                                                                                                   | Yes                                                                                                                                                                                                                                                                                                                                                                                                                                                                                                                                                                                                                                                                                                                                                                                                                                                                                                                                                                                                                                                                                                                                                                                                                                                                                                                                                                                                                                                                                                                                                                                                                                                                                                                                                                                                                                                                                                                                                                                                                                                                                            |

|                                                                                                                                                                                                                                                                                                                                                                                                                                                                                                                                                         |            |
|---------------------------------------------------------------------------------------------------------------------------------------------------------------------------------------------------------------------------------------------------------------------------------------------------------------------------------------------------------------------------------------------------------------------------------------------------------------------------------------------------------------------------------------------------------|------------|
| <p>A description of all resources used, including antibodies, cell lines, animals and software tools, with enough information to allow them to be uniquely identified, should be included in the Methods section. Authors are strongly encouraged to cite <a href="#">Research Resource Identifiers</a> (RRIDs) for antibodies, model organisms and tools, where possible.</p> <p>Have you included the information requested as detailed in our <a href="#">Minimum Standards Reporting Checklist</a>?</p>                                             |            |
| <p><b>Availability of data and materials</b></p> <p>All datasets and code on which the conclusions of the paper rely must be either included in your submission or deposited in <a href="#">publicly available repositories</a> (where available and ethically appropriate), referencing such data using a unique identifier in the references and in the “Availability of Data and Materials” section of your manuscript.</p> <p>Have you have met the above requirement as detailed in our <a href="#">Minimum Standards Reporting Checklist</a>?</p> | <p>Yes</p> |

[Click here to view linked References](#)

## The metagenome of the female upper reproductive tract

Chen Chen<sup>2,3,\*</sup>, Fei Li<sup>1,2,3\*</sup>, Weixia Wei<sup>4,5,\*</sup>, Zirong Wang<sup>2</sup>, Juanjuan Dai<sup>4,5</sup>, Lilan Hao<sup>2,3</sup>, Liju Song<sup>2,3</sup>, Xiaowei Zhang<sup>2,3</sup>, Liping Zeng<sup>4,5</sup>, Hui Du<sup>4,5</sup>, Huiru Tang<sup>4,5</sup>, Na Liu<sup>6</sup>, Huanming Yang<sup>2,9</sup>, Jian Wang<sup>2,9</sup>, Lise Madsen<sup>2,7,11</sup>, Susanne Brix<sup>12</sup>, Karsten Kristiansen<sup>2,7</sup>, Xun Xu<sup>2,3</sup>, Junhua Li<sup>2,3,8,13</sup>, Ruifang Wu<sup>4,5†</sup>, Huijue Jia<sup>2,3,8,10,†</sup>

<sup>1</sup>BGI Education Center, University of Chinese Academy of Sciences, Shenzhen 518083, China.

<sup>2</sup>BGI-Shenzhen, Shenzhen 518083, China.

<sup>3</sup>China National GeneBank, BGI-Shenzhen, Shenzhen 518120, China.

<sup>4</sup>Peking University Shenzhen Hospital, Shenzhen 518036, China.

<sup>5</sup>Shenzhen Key Laboratory on Technology for Early Diagnosis of Major Gynecological diseases, Shenzhen, PR China

<sup>6</sup>BGI genomics, BGI-Shenzhen, Shenzhen 518083, China

<sup>7</sup>Laboratory of Genomics and Molecular Biomedicine, Department of Biology, University of Copenhagen, Universitetsparken 13, 2100 Copenhagen, Denmark.

<sup>8</sup>Shenzhen Key Laboratory of Human Commensal Microorganisms and Health Research, BGI-Shenzhen, Shenzhen 518083, China.

<sup>9</sup>James D. Watson Institute of Genome Sciences, Hangzhou310000, China.

<sup>10</sup>Macau University of Science and Technology, Taipa, Macau 999078, China.

<sup>11</sup>Institute of Marine Research (IMR), Postboks 1870, Nordnes, N-5817, Bergen, Norway.

<sup>12</sup>Department of Biotechnology and Biomedicine, Technical University of Denmark, Soltofts Plads, 2800 Kongens. Lyngby, Denmark.

<sup>13</sup>School of Bioscience and Biotechnology, South China University of Technology, Guangzhou 510006, China;

\*These authors contributed equally to this work.

†Correspondence should be addressed to H. J. ([jiahuijue@genomics.cn](mailto:jiahuijue@genomics.cn), ORCID: 0000-0002-3592-126X) or R. W. ([wurf100@126.com](mailto:wurf100@126.com)).

1       31    **Abstract**

2  
3       32    *Background*

4  
5  
6       33    The human uterus is traditionally believed to be sterile, while the vaginal microbiota plays  
7  
8  
9       34    important role in fending off pathogens. Emerging evidence demonstrates the presence of  
10  
11  
12       35    bacteria beyond the vagina. However, a microbiome-wide metagenomic analysis identifying  
13  
14  
15       36    the overall microorganism communities has been lacking.

16  
17       37    *Results*

18  
19  
20       38    We performed shotgun-sequencing using the Illumina platform of 52 samples from the  
21  
22  
23       39    cervical canal and peritoneal fluid of Chinese women in reproductive age. Direct annotation  
24  
25  
26       40    of sequencing reads identified the taxonomy of bacteria, archaea, fungi and viruses,  
27  
28  
29       41    confirming and extending the results from our previous study. We replicated the findings in  
30  
31  
32       42    another 24 samples from the vagina, the cervical canal, the uterus and peritoneal fluid using  
33  
34  
35       43    BGISEQ-500 platform, revealing that microorganisms in the samples from the same  
36  
37  
38       44    individual were largely shared in the whole reproductive tract. Over 99% human sequences  
39  
40  
41       45    were detected in the 20GB raw data. After filtering, vaginal microorganisms were well  
42  
43  
44       46    covered in the generated reproductive tract gene catalogue, while the more diverse upper  
45  
46  
47       47    reproductive tract microbiota might need greater depth of sequencing and more samples to  
48  
49  
50       48    meet the full coverage scale.

51       49    *Conclusions*

52  
53       50    Microbiota in unprecedented data for uncharted body site, female upper reproductive tract,  
54  
55  
56       51    were analyzed in this study. The community results indicated that an intra-individual  
57  
58  
59       52    continuum of all types of microorganisms gradually changed from the vagina to the peritoneal  
60  
61  
62  
63  
64  
65

1 53 fluid. A framework was also established in this study aiming at understanding the  
2  
3 54 implications of the composition and functional potential of this distinct microbial ecosystem  
4  
5  
6 55 in relation to health and disease.  
7

8  
9 **56 Keywords**

10  
11 57 Metagenomics, Microbiota, Female upper reproductive tract  
12  
13  
14  
15 58

16  
17 **59 Background**

18  
19  
20 60 As humans evolved, the female reproductive tract has formed complex and unique structures  
21  
22 61 such as the uterus, cervix and the vagina. The human vagina hosts trillions of bacteria that can  
23  
24  
25 62 significantly impact the health of women and their neonates. The cervix has been regarded to  
26  
27  
28 63 be a perfect barrier between the vagina and uterus leading to the assumption that the upper  
29  
30  
31 64 reproductive tract functions in a sterile environment. However, judging from evidence in  
32  
33  
34 65 insects and other animals, humans are probably no exception with regard to vertical  
35  
36  
37 66 transmission of the mothers' microbiota before birth [1]. Thus, in humans, bacterial DNA has  
38  
39  
40 67 been detected in the placenta [2,3]. Based on our recent analyses using 16S rRNA amplicon  
41  
42  
43 68 sequencing, the upper reproductive tract, including cervix, uterus, fallopian tubes and  
44  
45  
46 69 peritoneal fluid harbor diverse communities of bacteria, though at low abundance [4].

47  
48 70 Recently, the studies of female reproductive tract microbiota have mainly focused on the  
49  
50  
51 71 vagina using 16S rRNA amplicon sequencing [5–7]. Studies using 16S rRNA gene amplicon  
52  
53  
54 72 sequencing have limitations in relation to lower taxonomic resolution and the lack of ability to  
55  
56  
57 73 perform species-specific functional inference. Metagenomic shotgun sequencing can address  
58  
59  
60 74 these limitations, but only a few studies have applied metagenomic shotgun sequencing on the  
61  
62  
63  
64  
65

1 75 vaginal microbiota [8], and no studies have characterized the compositional range of the  
2  
3 76 upper reproductive tract microbiome using metagenomic analysis. The present study is the  
4  
5  
6 77 first to provide metagenomic data from the female upper reproductive tract.  
7  
8  
9 78

## 10 11 79 **Data description**

12  
13 80 Samples of six locations (CL, lower third of vagina; CU, posterior fornix; CV, cervical mucus  
14  
15  
16 81 drawn from the cervical canal; ET, endometrium; FLL and FRL, left and right fallopian tubes;  
17  
18  
19 82 PF, peritoneal fluid from the pouch of Douglas) throughout the female reproductive tract from  
20  
21  
22 83 137 Chinese women of reproductive age, undergoing surgery for conditions not known to  
23  
24  
25 84 involve infection (**Supplementary Table 1**) were collected for this study. 16S rRNA gene  
26  
27  
28 85 amplicon sequencing was performed on 665 of these samples. The results from 476 of these  
29  
30  
31 86 have been published previously [4], and those from the remaining 189 were presented in this  
32  
33  
34 87 study. Two samples (1 CV and 1 CU) were subjected to shotgun sequencing with or without  
35  
36  
37 88 prior removal of human DNA using a commercial kit to test the experimental effect of host  
38  
39  
40 89 sequencing removing (refer to **Methods** section). Then, 25 PF and 25 CV samples were  
41  
42  
43 90 sequenced on the Illumina HiSeq platform using 100 bp paired-end (PE) sequencing (for the  
44  
45  
46 91 stringent selection rules of samples, see **Methods** for details). For these 52 samples, 20GB of  
47  
48  
49 92 raw data per sample, corresponding to a total of 0.99 TB were generated. Additionally,  
50  
51  
52 93 intra-individual similarity in the vagino-uterine microbiota were also examined basing on 24  
53  
54  
55 94 samples from different sites of the reproductive tract (CL, CU, CV, ET, PF) in 6 women.  
56  
57  
58 95 These samples were sequenced on the BGISEQ-500 sequencer using 100 bp single-end (SE)  
59  
60  
61 96 sequencing and generated 60GB of raw data per sample, totaling 1.40 TB. The dataset after  
62  
63  
64  
65



1 97 filtering out low-quality and host reads (refer to **Methods** section) is available via the EBI  
2  
3 98 database using the accession number PRJEB24147.  
4  
5  
6 99

## 9 100 **Analyses and Discussion**

### 10 101 *Metagenomic sequencing*

11  
12  
13  
14 102 According to shotgun-sequencing of vaginal samples by the Human Microbiome Project  
15  
16  
17 103 (HMP) and of placental samples by Aagaard *et al.*, over 90% of the sequences were derived  
18  
19  
20 104 from human host DNA [2,9]. To overcome this problem, we first tested a commercial kit that  
21  
22  
23 105 removes human DNA by binding and precipitating CpG-methylated DNA. Unfortunately,  
24  
25  
26 106 after the kit treatment, a considerable amount (99.9% for CV sample and 79% for CU sample)  
27  
28  
29 107 of host DNA still remained (**Supplementary Fig. 1a**). Furthermore, the bacteria compositions  
30  
31  
32 108 varied by kit treatment when comparing with the control group (**Supplementary Fig. 1b**). We  
33  
34  
35 109 therefore abandoned the strategy of host DNA removal prior to shotgun metagenomics  
36  
37  
38 110 sequencing.

39 111 The sample selection was founded on the data from CV and PF samples [4], which we  
40  
41  
42 112 identified as robust representations of the overall samples. Since higher amounts of DNA is  
43  
44  
45 113 required for shotgun-sequencing results, a more stringent rule was set as the following two  
46  
47  
48 114 criteria: individual sub-clusters representation and sufficient DNA amount (see details in  
49  
50  
51 115 **Methods** section). To follow the former criterion, clustering results based on the relative  
52  
53  
54 116 abundances of OTUs in the PF and CV samples showed that the samples marked with red (all  
55  
56  
57 117 containing DNA > 1 µg) were well distributed amongst all collected samples  
58  
59 118 (**Supplementary Fig. 2**), so these were selected for shotgun-sequencing in this study. As a  
60  
61  
62  
63  
64  
65

1 119 result, 25 PF and 25 CV samples were selected for sequencing using the Illumina HiSeq 4000  
2  
3 120 platform. After quality control, high-quality reads were aligned to hg 19 using SOAP and  
4  
5  
6 121 GRCh38 using DeconSeq to remove human reads (see details in **Methods** section). The  
7  
8  
9 122 average host contamination rate of 99.72% for CV and 99.93% for PF (**Supplementary**  
10  
11 123 **Table 2**), which were lower than that previously reported for placenta samples [2].

12 124 The findings further expanded by inclusion of additional 24 samples subjected to sequencing  
13  
14 125 on the BGISEQ-500 platform, in which we also examined the intra-individual similarity in  
15  
16  
17 126 the vagino-uterine microbiota based on samples from different sites of the reproductive tract  
18  
19  
20 127 (CL, CU, CV, ET, PF). The average host contamination rate for vagina (CL, CU) samples  
21  
22  
23 128 was 96.55%, and lower than those of the CV, ET and PF samples, which all above 99.5%  
24  
25  
26 129 (**Supplementary Table 2**).

27  
28  
29 130 *A diverse microbiome in the cervical canal and the peritoneal fluid of reproductive age*  
30  
31 131 *women*

32  
33  
34 132 To obtain an overview of the overall composition of the vagino-uterine microbiome, we used  
35  
36  
37 133 Kraken to directly assign sequencing reads to all types of microbial taxa [10]. The dominant  
38  
39  
40 134 *Lactobacillus* spp. in CV and *Pseudomonas* spp. in PF were detected in the present study and  
41  
42  
43 135 in corresponded with the previous study [4]. In addition, the microbiome that comprise  
44  
45  
46 136 methane-producing archaea, yeasts, herpesviruses, papillomaviruses, and bacteriophages were  
47  
48  
49 137 also founded (**Fig. 1a, b**).

50  
51  
52 138 The abundance of these taxonomic units varied among samples, and those constituting more  
53  
54  
55 139 than 0.1% of the total reads number were identified in the CV and PF samples from the same  
56  
57  
58 140 individual (**Fig. 1c**).

1  
2  
3  
4  
5  
6  
7  
8  
9  
10  
11  
12  
13  
14  
15  
16  
17  
18  
19  
20  
21  
22  
23  
24  
25  
26  
27  
28  
29  
30  
31  
32  
33  
34  
35  
36  
37  
38  
39  
40  
41  
42  
43  
44  
45  
46  
47  
48  
49  
50  
51  
52  
53  
54  
55  
56  
57  
58  
59  
60  
61  
62  
63  
64  
65

1 141 To gain further insight into compositional similarities of the microbiota at different sites of  
2  
3 142 the reproductive tract in the same individual, we selected taxa at the family level which  
4  
5  
6 143 fulfilled two criteria: they were presented in at least two sites of the same individual and the  
7  
8  
9 144 relative abundance was higher than 0.1%. Taxa fulfilling these criteria made up more than 45%  
10  
11 145 of the microorganisms presented in the samples across the 6 individuals subjected for this  
12  
13 146 detailed analysis (**Fig. 2**). Lactobacillaceae or Bifidobacteriaceae dominated in vagina (CL  
14  
15 and CU), but not in the upper reproductive tract, where microorganisms such as  
16  
17 147 Pseudomonadaceae, Propionibacteriaceae, Streptococcaceae and Moraxellaceae constituted a  
18  
19 148 notable fraction of the microbiota. In addition, eukaryotes, viruses and archaea, such as  
20  
21 149 Saccharomycetaceae, Herpesviridae, Ferroplasmaceae were also found in the female  
22  
23 150 reproductive tract. The results at the bacterial level are in keeping with our findings in a  
24  
25 151 recent study [4], and the current data further demonstrates an intra-individual continuum of all  
26  
27 152 types of microorganisms that gradually changes from the vagina to the peritoneal fluid.  
28  
29  
30  
31  
32  
33  
34  
35

#### 36 154 *Genes from the vagino-uterine microbiota*

37  
38  
39 155 Reference gene catalogs have greatly facilitated analyses of the microbiome, especially the  
40  
41 156 human gut microbiome [11–13]. Here, we established the first gene catalog of the  
42  
43 157 microbiome of the female upper reproductive tract, which comprises of 60,699 genes.  
44  
45  
46

47 158 Rarefaction analysis based on gene number revealed a curve approaching saturation with  
48  
49 159 about 23 CV samples (**Fig. 3**). However, rarefaction analysis based on gene numbers in PF  
50  
51 160 samples revealed a curve that close to saturation but still did not reach the plateau, possibly  
52  
53 161 due to a more diverse microbiota in PF. Therefore, with 20GB sequences per sample, vaginal  
54  
55 162 bacteria could be well covered, whereas characterization of bacteria from the upper  
56  
57  
58  
59  
60  
61  
62  
63  
64  
65

1 163 reproductive tract would require a higher amount of sequences and more samples.  
2  
3 164 We annotated the genes in the gene catalog according to the Kyoto Encyclopedia of Genes  
4  
5  
6 165 and Genomes (KEGG) [14]. The matched genes in PF (15,316 genes) were all covered within  
7  
8  
9 166 CV (39,087 genes). Comparing CV and PF in the distribution of KEGG pathways, PF showed  
10  
11  
12 167 a greater proportion of genes in carbohydrate metabolism, replication and repair, membrane  
13  
14  
15 168 transport and drug resistance, whereas the genes involved in translation, energy metabolism  
16  
17  
18 169 and metabolism of cofactors and vitamins were enriched in CV (**Fig. 4**). In KO modules, CV  
19  
20  
21 170 showed enrichment of transport systems for thiamine, cystine, teichoic acid, taurine and  
22  
23  
24 171 putative ABC transport systems compared to PF. Regulatory systems of aerobic and  
25  
26  
27 172 anaerobic respiration, osmotic stress response and multicellular behavior control also enriched  
28  
29  
30 173 in CV (**Supplementary Table 3**).

31 174

## 33 175 **Methods**

### 36 176 *Sample description*

37  
38  
39 177 A total of 137 Chinese women of reproductive age, undergoing surgery for conditions not  
40  
41  
42 178 known to involve infection (hysteromyoma, adenomyosis, endometriosis, and  
43  
44  
45 179 salpingemphraxis) were enrolled in this study (**Supplementary Table 1**). Samples were taken  
46  
47  
48 180 from the CL, CU and CV on the day of the clinical visit without any prior disturbance.  
49  
50  
51 181 Depending on the clinical conditions, laparoscopy or laparotomy were performed, and  
52  
53  
54 182 samples from the ET, FLL, FRL and PF were taken during surgery (**Supplementary Table 1**).  
55  
56  
57 183 The study was approved by the institutional review boards at Peking University Shenzhen  
58  
59  
60 184 Hospital and BGI-Shenzhen, and all women provided written informed consent. The subject  
61  
62  
63  
64  
65

1 185 exclusion criteria, sampling and DNA extraction methods can be found in [4].  
2  
3 186 To test the effect of experimental removal of human DNA, one CU sample and one CV  
4  
5  
6 187 sample were used to shotgun sequencing on Illumina HiSeq2000 platform with or without  
7  
8  
9 188 prior removal of human DNA, respectively. The NEBNext Microbiome DNA Enrichment Kit  
10  
11  
12 189 was used here according to the manufacturer's instructions with a total of 10 µg input DNA  
13  
14  
15 190 per sample.  
16  
17 191 Then we made a prior selection of samples to undergo shotgun-sequencing. The selection was  
18  
19  
20 192 founded on the data from CV and PF samples [4] based on the following two criteria: i)  
21  
22  
23 193 samples should represent individual sub-clusters when subjected to hierarchical  
24  
25  
26 194 (centroid-linkage) clustering based on relative abundances of operational taxonomic units  
27  
28  
29 195 (OTUs) from 16S rRNA gene amplicon sequencing; ii) the amount of DNA should be above  
30  
31  
32 196 1 µg. The samples with good scattering in different clusters based on the relative abundances  
33  
34  
35 197 of OTUs in the PF and CV samples were selected for shotgun-sequencing on Illumina  
36  
37  
38 198 HiSeq4000 platform.  
39  
40  
41 199 We replicated the findings in another 24 samples on the BGISEQ-500 platform, where  
42  
43  
44 200 additional sites (CL, CU, CV, ET and PF) of 6 women were moreover involved. To meet the  
45  
46  
47 201 need of library construction, the amount of DNA in the all 24 samples were above 1 µg. And  
48  
49  
50 202 three qualified samples for each woman were set as a threshold.

#### 51 203 52 53 204 *Metagenomic shotgun sequencing*

54  
55  
56 205 Library construction and shotgun sequencing using Illumina HiSeq2000/4000 platforms  
57  
58  
59 206 (insert size 350 bp; 100 bp of PE reads; two replicate libraries were constructed for each lane.)  
60  
61  
62  
63  
64  
65

1 207 and BGISEQ-500 (100 bp of SE reads; one library was constructed for each lane) were  
2  
3 208 performed as previously described [15] (and see protocol in protocols.io[16]). The quality  
4  
5  
6 209 control of sequencing data from the HiSeq and BGISEQ platforms were also followed this  
7  
8  
9 210 study. Then, human sequences were eliminated by alignment to the hg19 reference genome  
10  
11 211 using SOAP2.22 (SOAPaligner/soap2, RRID:SCR\_005503). As the resulting data still  
12  
13  
14 212 contained human sequences, a more stringent procedure using DeconSeq by aligning data to  
15  
16  
17 213 the GRCh38 reference genome was applied [17].  
18  
19

#### 20 214 ***Taxonomic assignment of sequencing reads***

21  
22 215 High-quality, non-human sequences were tentatively assigned to microbial taxa using Kraken  
23  
24  
25 216 with default parameters (Kraken, RRID:SCR\_005484)[10]. For pair-end reads Kraken  
26  
27  
28 217 concatenated the pairs together with a single N between the sequences automatically  
29  
30  
31 218 with default parameters and the manual clarified that this software raised the sensitivity  
32  
33  
34 219 by about 3 percentage points over classifying the sequences as single-end reads.  
35

#### 36 220 ***Construction of a gene catalog***

37  
38  
39 221 The high-quality, non-human sequencing reads of 52 samples sequenced by Illumina HiSeq  
40  
41  
42 222 platforms were *de novo* assembled into contigs using IDBA-UD (IDBA-UD  
43  
44  
45 223 (RRID:SCR\_011912))[18]. We used the same strategy as previous study [12,13], where genes  
46  
47  
48 224 were predicted from the contigs by MetaGeneMark [19], and highly similar genes (95%  
49  
50  
51 225 identity, 90% overlap) were removed as redundancy using CD-HIT (CD-HIT,  
52  
53  
54 226 RRID:SCR\_007105) [20]. Functional annotations were made by BLASTP (v2.2.24) based on  
55  
56  
57 227 KEGG (v76) databases (KEGG , RRID:SCR\_012773)[14].  
58  
59

60  
61  
62  
63  
64  
65 228

1 229 ***Availability of Supporting Data***

2  
3 230 The sequencing data after filtering out low-quality and host reads is available via the EBI  
4  
5  
6 231 database using the accession number PRJEB24147. Additional supporting data is available  
7  
8  
9 232 via the *GigaScience* GigaDB database [21].

10  
11  
12 233 ***Abbreviations***

13  
14  
15  
16 234 bp: base pair; GB: Gigabase; HMP: Human Microbiome Project; KEGG: Kyoto Encyclopedia  
17  
18 235 of Genes and Genomes; OTU: operational taxonomic units; PE: paired-end; SE: single-end.

19  
20  
21  
22 236 ***Author's contributions***

23  
24  
25 237 H.J. and R.W. conceived and directed the project. W.W., J.D., L.Z., H.D., H.T., and R.W.  
26  
27 238 performed the clinical diagnosis, sample collection. C.C., Z.W., F.L., and L.H. performed the  
28  
29 239 bioinformatic analyses and prepared display items. C.C., F.L., Z.W., X.Z., J.L. and H.J. wrote  
30  
31  
32 240 the first version of the manuscript. L.M., S.B. and K.K. revised the manuscript. All authors  
33  
34  
35 241 contributed to the final revision of the manuscript.

36  
37  
38  
39 242  
40  
41 243 ***Acknowledgements***

42  
43  
44 244 The study was supported by the Shenzhen Municipal Government of China  
45  
46 245 (JCYJ20160229172757249, JCYJ20150601090833370), the grant from the Macau  
47  
48  
49 246 Technology Development Fund (102/2016/A3). We gratefully acknowledge colleagues at  
50  
51  
52 247 BGI-Shenzhen for DNA quality control, library construction, sequencing, and helpful  
53  
54  
55 248 discussions.

56  
57  
58 249  
59  
60  
61  
62  
63  
64  
65

1 250 **Competing financial interests**

2  
3 251 The authors declare no competing financial interests.

4  
5  
6 252 **References**

- 7  
8  
9 253 1. Funkhouser LJ, Bordenstein SR. Mom Knows Best: The Universality of Maternal  
10 254 Microbial Transmission. *PLoS Biol.* 2013;11:e1001631.
- 11  
12 255 2. Aagaard K, Ma J, Antony KM, Ganu R, Petrosino J, Versalovic J. The placenta harbors a  
13 256 unique microbiome. *Sci. Transl. Med.* 2014;6:237ra65.
- 14  
15  
16 257 3. Antony KM, Ma J, Mitchell KB, Racusin DA, Versalovic J, Aagaard K. The Preterm  
17 258 Placental Microbiome Varies in Association with Excess Maternal Gestational Weight Gain.  
18 259 *Am J Obs. Gynecol.* Elsevier; 2014;212:653.e1-653.e16.
- 19  
20  
21 260 4. Chen C, Song X, Wei W, Zhong H, Dai J, Lan Z, et al. The microbiota continuum along  
22 261 the female reproductive tract and its relation to uterine-related diseases. *Nat Commun.* 2017  
23 262 Oct 17;8(1):875. doi: 10.1038/s41467-017-00901-0.
- 24  
25  
26 263 5. Ravel J, Gajer P, Abdo Z, Schneider GM, Koenig SSK, Mcculle SL, et al. Vaginal  
27 264 microbiome of reproductive-age women. *Proc. Natl. Acad. Sci.* 2010;108:4680–7.
- 28  
29 265 6. Gajer P, Brotman RM, Bai G, Sakamoto J, Schutte UME, Zhong X, et al. Temporal  
30 266 Dynamics of the Human Vaginal Microbiota. *Sci. Transl. Med.* 2012;4:132ra52-132ra52.
- 31  
32 267 7. Ding T, Schloss PD. Dynamics and associations of microbial community types across the  
33 268 human body. *Nature.* 2014 May 15;509(7500):357-60. doi: 10.1038/nature13178.
- 34  
35  
36 269 8. Lloyd-price J, Mahurkar A, Rahnvard G, Crabtree J, Orvis J, Hall AB, et al. Strains ,  
37 270 functions and dynamics in the expanded Human Microbiome Project. *Nature.* 2017 Oct  
38 271 5;550(7674):61-66. doi: 10.1038/nature23889.
- 39  
40 272 9. Methé BA, Nelson KE, Pop M, Creasy HH, Giglio MG, Huttenhower C, et al. A  
41 273 framework for human microbiome research. *Nature.* 2012;486:215–21.
- 42  
43  
44 274 10. Wood DE, Salzberg SL. Kraken: ultrafast metagenomic sequence classification using  
45 275 exact alignments. *Genome Biol.* 2014;15:R46.
- 46  
47 276 11. Wang J, Jia H. Metagenome-wide association studies: fine-mining the microbiome. *Nat.*  
48 277 *Rev. Microbiol.* 2016;14:508–22.
- 49  
50  
51 278 12. Li J, Jia H, Cai X, Zhong H, Feng Q, Sunagawa S, et al. An integrated catalog of  
52 279 reference genes in the human gut microbiome. *Nat. Biotechnol.* 2014;32:834–41.
- 53  
54 280 13. Xie H, Guo R, Zhong H, Feng Q, Lan Z, Qin B, et al. Shotgun Metagenomics of 250  
55 281 Adult Twins Reveals Genetic and Environmental Impacts on the Gut Microbiome. *Cell Syst.*  
56 282 2016;
- 57  
58  
59 283 14. Kanehisa M, Sato Y, Kawashima M, Furumichi M, Tanabe M. KEGG as a reference  
60 284 resource for gene and protein annotation. 2016;44:457–62.
- 61  
62  
63  
64  
65



- 1  
2  
3  
4  
5  
6  
7  
8  
9  
10  
11  
12  
13  
14  
15  
16  
17  
18  
19  
20  
21  
22  
23  
24  
25  
26  
27  
28  
29  
30  
31  
32  
33  
34  
35  
36  
37  
38  
39  
40  
41  
42  
43  
44  
45  
46  
47  
48  
49  
50  
51  
52  
53  
54  
55  
56  
57  
58  
59  
60  
61  
62  
63  
64  
65
- 285 15. Fang C, Zhong H, Lin Y, Chen B, Han M, Ren H, et al. Assessment of the cPAS-based  
286 BGISEQ-500 platform for metagenomic sequencing. *Gigascience*. 2018 Mar 1;7(3):1-8. doi:  
287 10.1093/gigascience/gix133.
- 288 16. Jie Huang, Xinming Liang, Yuankai Xuan, Chunyu Geng, Yuxiang Li, Haorong Lu,  
289 Shoufang Qu, Xianglin Mei, Hongbo Chen, Ting Yu, Nan Sun, Junhua Rao, Jiahao Wang,  
290 Wenwei Zhang, Ying Chen, Sha Liao, Hui Jiang, Xin Liu, Zhaopeng Yang, Feng Mu,  
291 Shangxian Gao (2018). BGISEQ-500 WGS library construction. *protocols.io*  
292 [dx.doi.org/10.17504/protocols.io.ps5dng6](https://doi.org/10.17504/protocols.io.ps5dng6)
- 293 17. Schmieder R, Edwards R. Fast identification and removal of sequence contamination from  
294 genomic and metagenomic datasets. *PLoS One*. 2011;6.
- 295 18. Peng Y, Leung HCM, Yiu SM, Chin FYL. IDBA-UD: a de novo assembler for single-cell  
296 and metagenomic sequencing data with highly uneven depth. *Bioinformatics*. 2012;28:1420–  
297 8.
- 298 19. Hyatt D, Locascio PF, Hauser LJ, Uberbacher EC. Gene and translation initiation site  
299 prediction in metagenomic sequences. *Bioinformatics*. 2012;28:2223–30.
- 300 20. Li W, Godzik A. Cd-hit: a fast program for clustering and comparing large sets of protein  
301 or nucleotide sequences. *Bioinformatics*. 2006;22:1658–9.
- 302 21. Chen C; Li F; Wei W; Wang Z; Dai J; Hao L; Song L; Zhang X; Zeng L; Du H; Tang H; Liu  
303 N; Yang H; Wang J; Madsen L; Brix S; Kristiansen K; Xu X; Li J; Wu R; Jia H (2018):  
304 Supporting data for "The metagenome of the female upper reproductive tract" *GigaScience*  
305 Database. <http://dx.doi.org/10.5524/100491>

1 307 **Figure legends**

2  
3  
4 308 **Figure 1: The overall microbiome composition of the cervical canal and the peritoneal**  
5  
6 309 **fluid of reproductive age women.** Cumulative bar charts of the main taxa at domain (a) and  
7  
8  
9 310 family (b) levels in CV and PF samples. (c) Compositional overlap at family level of CV and  
10  
11  
12 311 PF samples from the same individuals. Relative number of reads was calculated as  $N_p =$   
13  
14 312  $\frac{a_p}{a_t} \times m$ , where  $a_p$  is the number of reads within  $p$  taxa in  $a$  sample.  $a_t$  is the total number  
15  
16  
17 313 of reads within  $a$  sample,  $m$  is median number of reads within all 50 samples. When  $p$  taxa  
18  
19  
20 314 is shared by CV and PF samples from the same individuals, and at the same time both  
21  
22  
23 315  $N_p$  values are higher than  $0.1\% \times m$ , the  $p$  taxa is included in the cumulative bar charts.  
24  
25  
26 316 Taxa names (b, c) in black, purple, and blue denote bacteria, eukaryote and viruses,  
27  
28  
29 317 respectively.

30  
31  
32 318 **Figure 2: Composition of the vagino-uterine microbiota.** (a, c, e, g, i, k) Venn diagram  
33  
34  
35 319 depicting shared taxa at the family levels in samples collected at different sites in the same  
36  
37  
38 320 individual. (b, d, f, h, k, l) Cumulative bar charts of the taxa with relative abundance higher  
39  
40  
41 321 than 0.1% and present in at least two sites of the same individual. Taxa names (b, c) in black,  
42  
43  
44 322 purple, blue, and grey denote bacteria, eukaryote, viruses and archaea, respectively.

45  
46  
47 323 **Figure 3: Rarefaction of microbial gene content in CV (a) and PF (b) samples.** The  
48  
49  
50 324 number of genes in each group was calculated after 100 random samplings with replacement.  
51  
52  
53 325 Boxes denote the interquartile range (IQR) between the first and third quartiles (25th and 75th  
54  
55  
56 326 percentiles, respectively) and the line inside denotes the median. Whiskers denote the lowest  
57  
58  
59 327 and highest values within 1.5 times IQR from the first and third quartiles, respectively.  
60  
61  
62  
63  
64  
65

1 328 Circles denote outliers beyond the whiskers.

2  
3  
4 329 **Figure 4: KEGG pathway classification of the vagino-uterine microbiome.** Comparison  
5  
6  
7 330 of CV (red) and PF (blue) data based on KEGG annotation, which emphasizes functional  
8  
9  
10 331 similarity of the CV and PF microbiota.

11  
12  
13  
14 332

15  
16  
17 333 **Supplementary Figure legends**

18  
19  
20  
21 334 **Supplementary Figure 1: Evaluation of the NEBNext Microbiome DNA Enrichment Kit**  
22  
23  
24 335 **by two comparative strategies.** Sample names suffixed by “-HR” represent DNA samples  
25  
26  
27 336 that were treated with the kit for removal of host DNA before shotgun sequencing, while  
28  
29  
30 337 sample names suffixed by A represent DNA samples that were subjected to shotgun  
31  
32  
33 338 sequencing directly (a). The table data shows the obtained read number, and remaining reads  
34  
35  
36 339 after removal of host DNA reads in the two samples. b) Influence of host DNA presence on  
37  
38  
39 340 bacterial DNA identification during shotgun sequencing. The plots display the compositional  
40  
41  
42 341 difference amongst major bacteria genera in samples with and without (-HR) host DNA  
43  
44  
45 342 presence. Data were analyzed by mapping reads to the ICG bacterial reference gene catalog  
46  
47 343 [12].

48  
49  
50 344 **Supplementary Figure 2: Samples selected for metagenomic sequencing.** Hierarchical  
51  
52  
53 345 clustering of CV (a) and PF (b) samples based on the relative abundances of OTUs. Samples  
54  
55  
56 346 which represent individual sub-clusters and hold DNA amounts above 1 µg were selected for  
57  
58  
59 347 shotgun-sequencing (red).

a

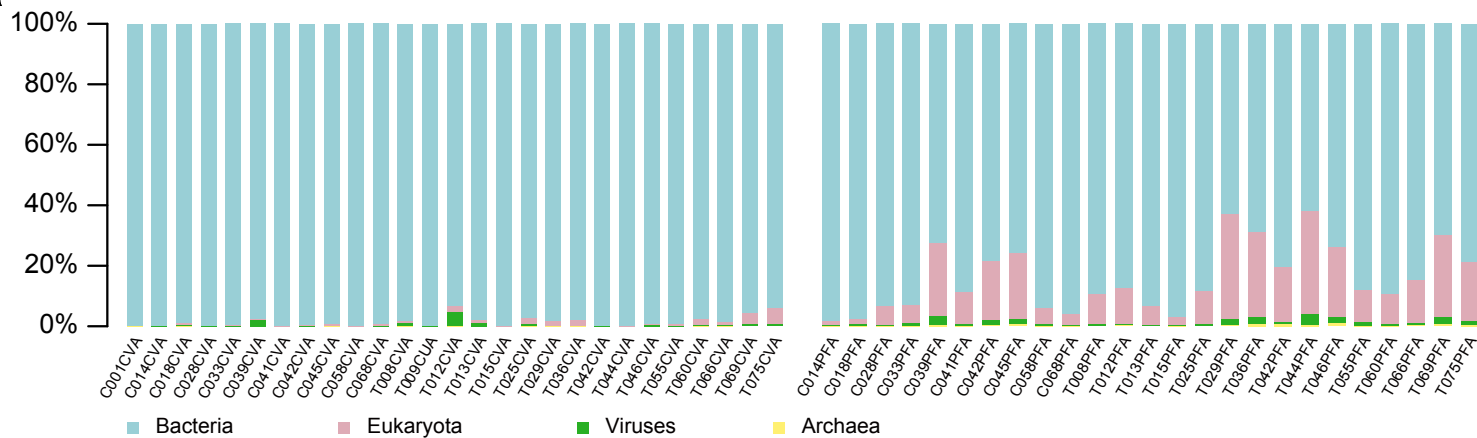

b

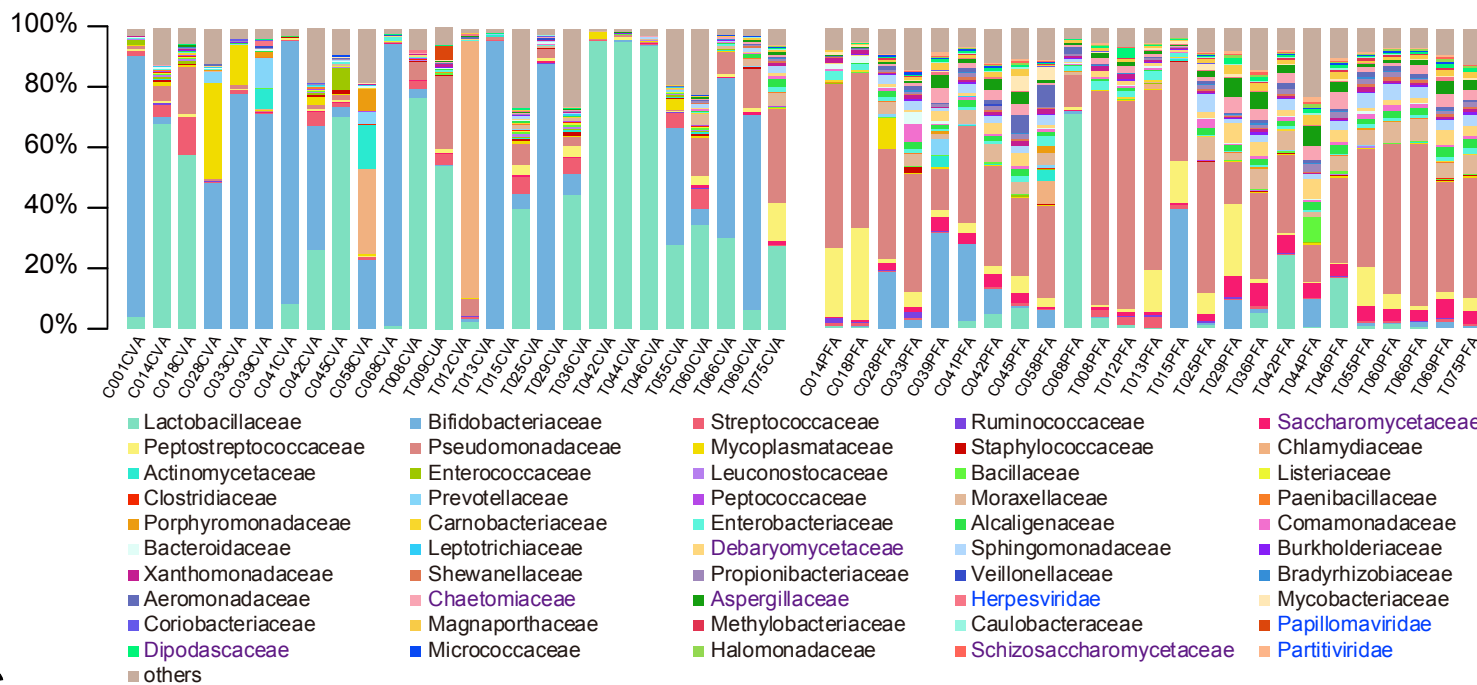

c

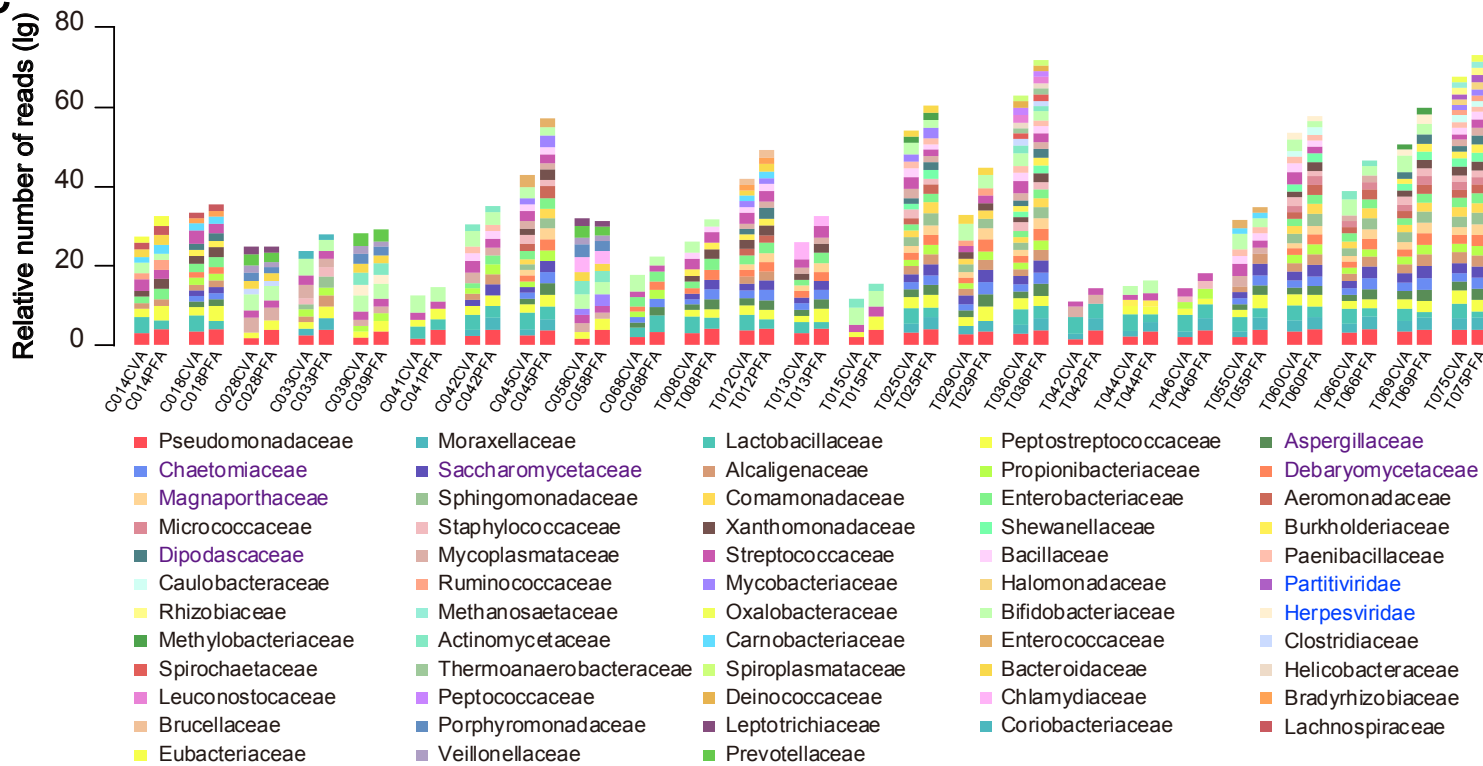

Figure 2

[Click here to access/download;Figure;FIG2-20180126.pdf](#)

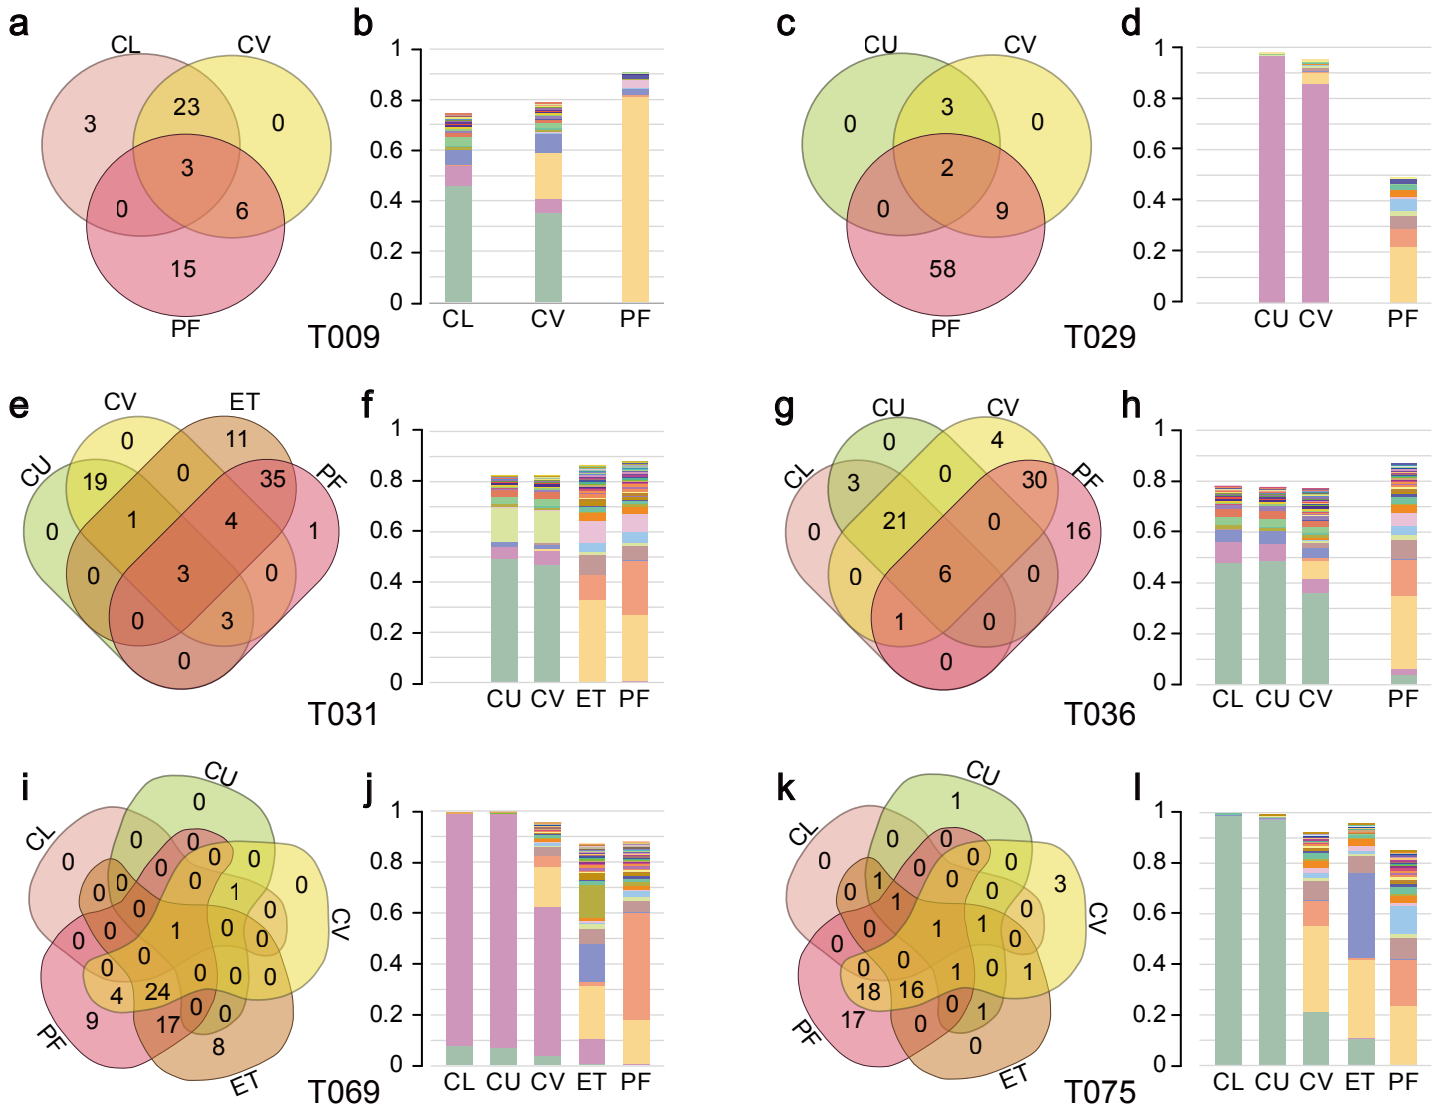

- Lactobacillaceae
- Moraxellaceae
- Staphylococcaceae
- Cordycipitaceae
- Ajellomycetaceae
- Chaetomiaceae
- Aspergillaceae
- Herpotrichiellaceae
- Clostridiaceae
- Arthrodermataceae
- Carnobacteriaceae
- Aureobasidiaceae
- Erysipelotrichaceae
- Bradyrhizobiaceae
- Herpesviridae
- Leptotrichiaceae
- Bifidobacteriaceae
- Saccharomycetaceae
- Alcaligenaceae
- Peptoniphilaceae
- Glomerellaceae
- Bacillaceae
- Dermateaceae
- Pleosporaceae
- Neisseriaceae
- Corynebacteriaceae
- Plectosphaerellaceae
- Atopobiaceae
- Dictyoglomaceae
- Brucellaceae
- Leptosphaeriaceae
- Tremellaceae
- Pseudomonadaceae
- Comamonadaceae
- Ruminococcaceae
- Mycobacteriaceae
- Debariomycetaceae
- Burkholderiaceae
- Methylobacteriaceae
- Listeriaceae
- Paenibacillaceae
- Magnaporthaceae
- Campylobacteraceae
- Helicobacteraceae
- Ferroplassmaceae
- Spiroplasmataceae
- Pseudeurotiaceae
- Pucciniaceae
- Propionibacteriaceae
- Enterobacteriaceae
- Peptostreptococcaceae
- Micrococcaceae
- Enterococcaceae
- Hypocreaceae
- Aeromonadaceae
- Peptococcaceae
- Deinococcaceae
- Rhizobiaceae
- Spirochaetaceae
- Rhodobacteraceae
- Mycosphaerellaceae
- Planctomycetaceae
- Thermoanaerobacteriales\_Family\_III\_Incertae\_Sedis
- Streptococcaceae
- Sphingomonadaceae
- Xanthomonadaceae
- Sordariaceae
- Leuconostocaceae
- Clavicipitaceae
- Mycoplasmataceae
- Actinomycetaceae
- Shewanellaceae
- Ustilaginaceae
- Orbiliaceae
- Sclerotiniaceae
- Rhodospirillaceae
- Nostocaceae
- Agaricaceae

**a**

Rarefaction of genes

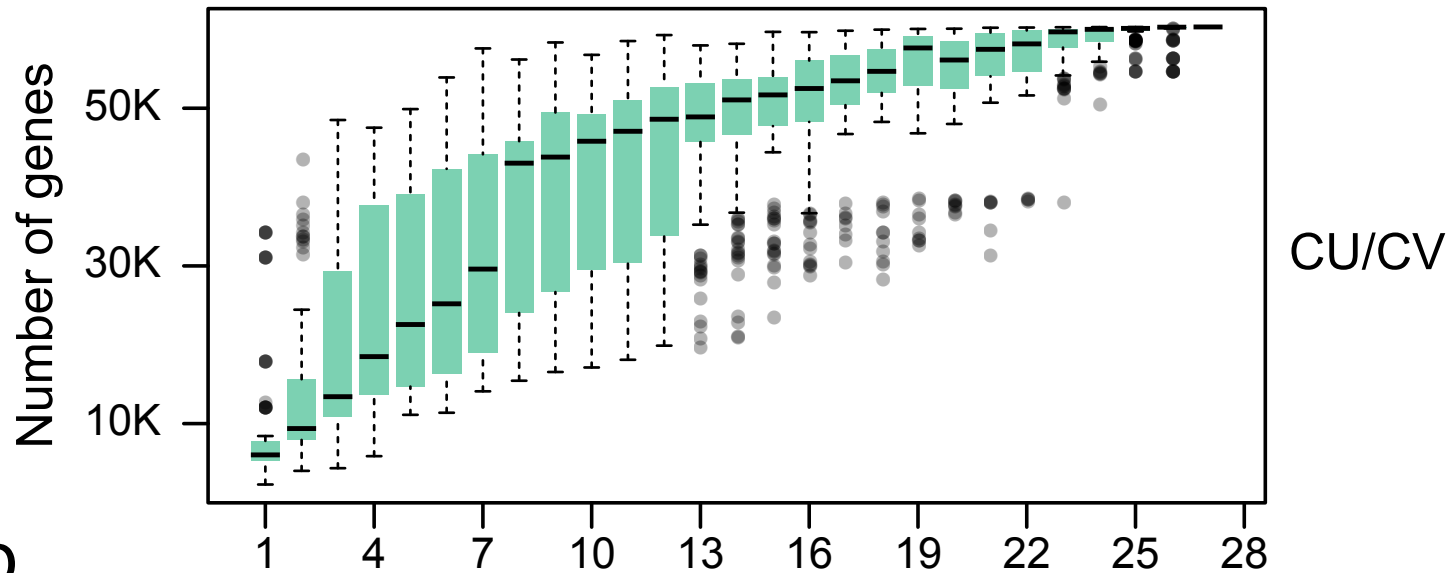

**b**

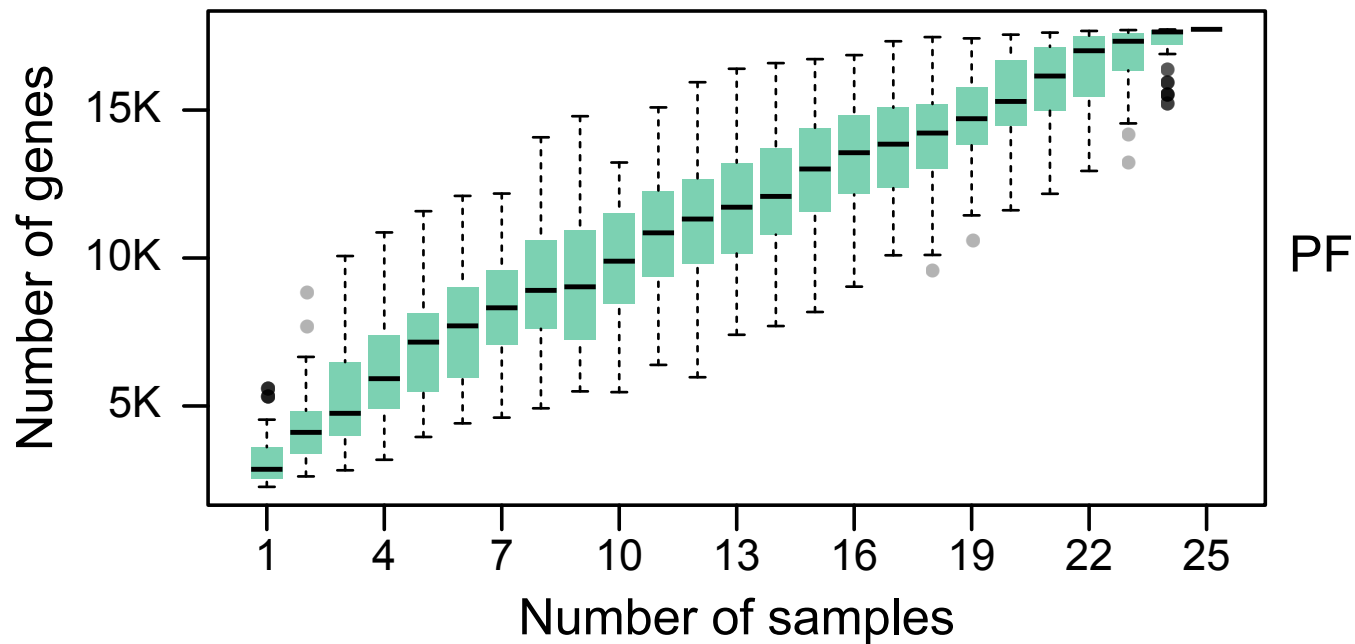

Figure 4

## KEGG pathway classification

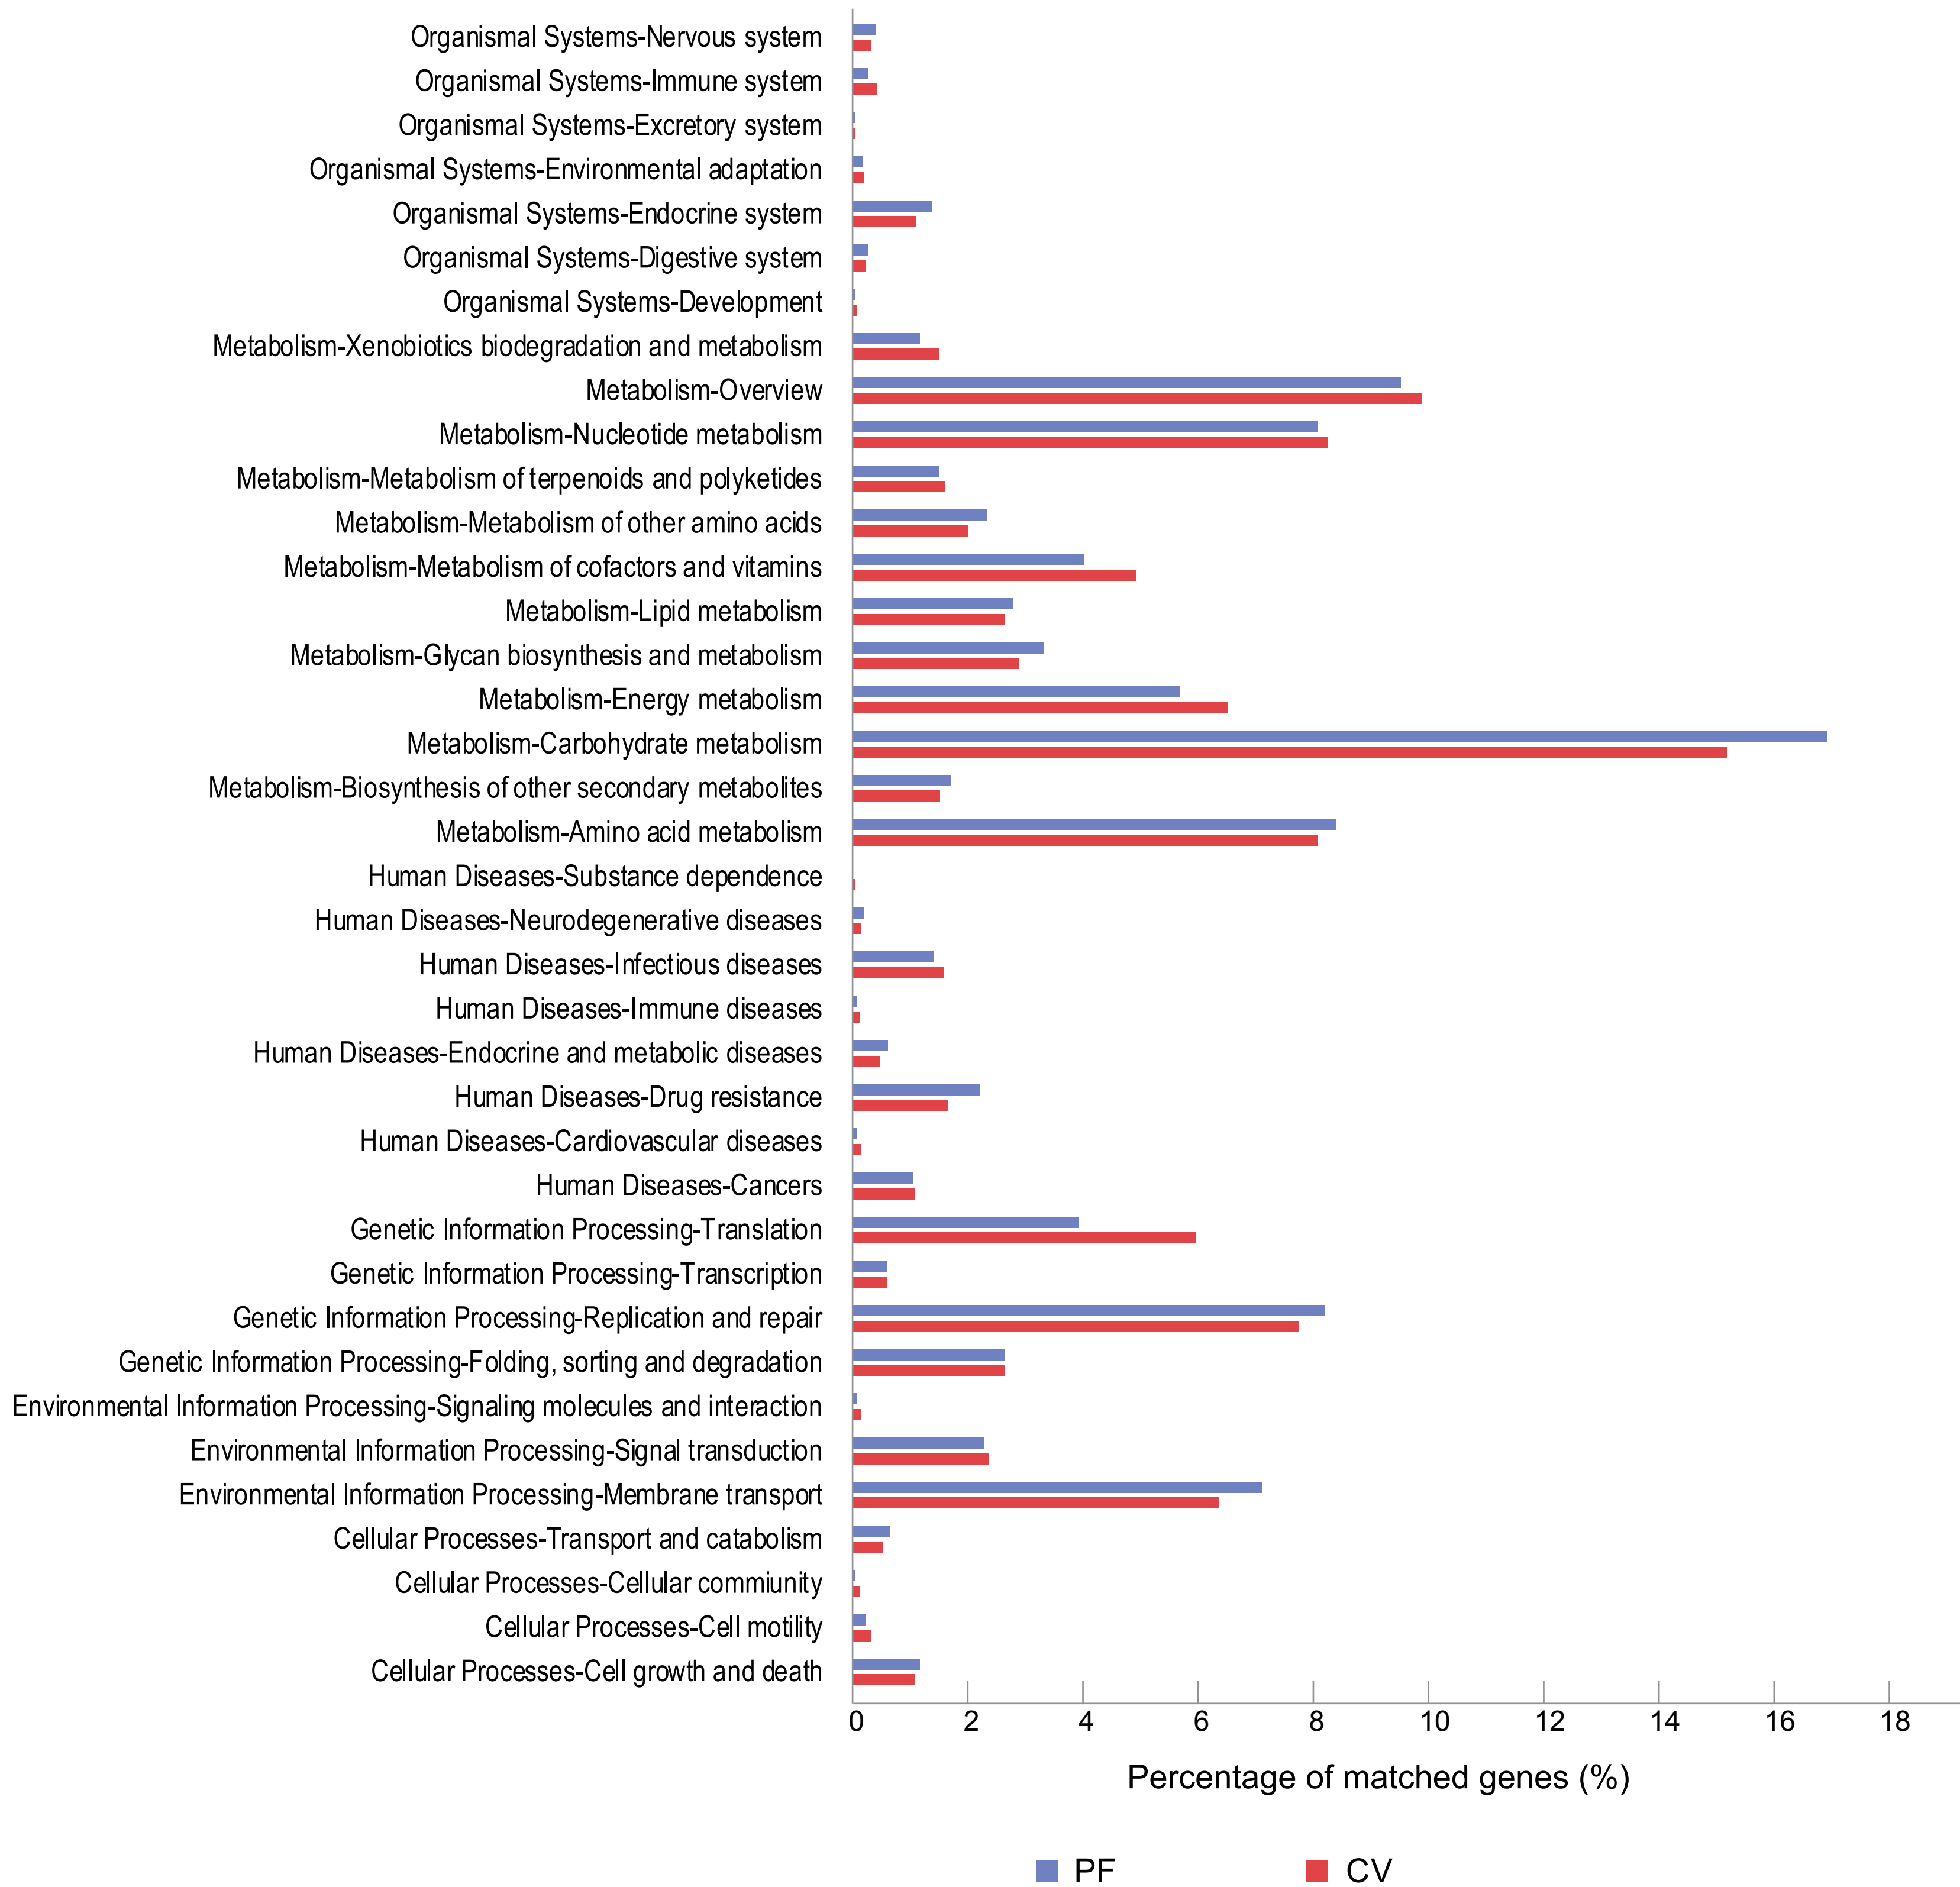

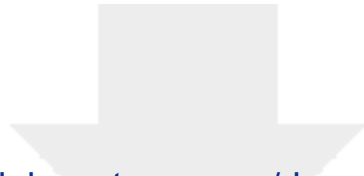

Click here to access/download  
**Supplementary Material**  
SFIG1-20180126.pdf

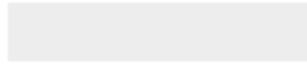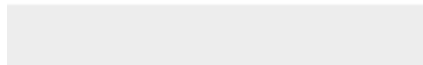





Click here to access/download  
**Supplementary Material**  
SFIG2-20180126.pdf

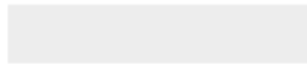

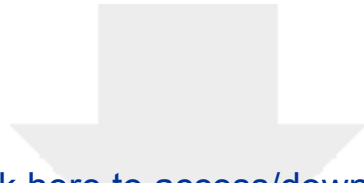

[Click here to access/download](#)

**Supplementary Material**

Supplementary Table 1-20180126.xlsx



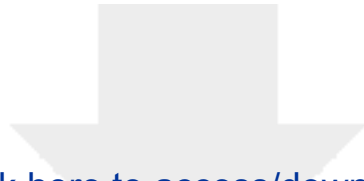

[Click here to access/download](#)

**Supplementary Material**

Supplementary Table 2-20180126.xlsx

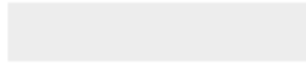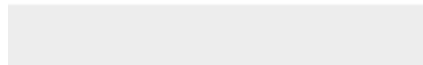



Click here to access/download  
**Supplementary Material**  
Supplementary Table 3.xlsx

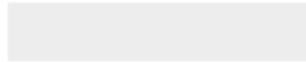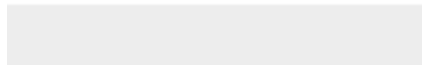

Supplement: giy107_giga-d-18-00184_revision_1.pdf [file giy107_giga-d-18-00184_revision_1.pdf]
